# Supplementary material
Source: Research Square preprint supplement (doi:10.21203/rs.3.rs-9101224/v1)
Supplement: Supplementary file 1 [file 3821d1439b42322bb3a0dbe1.xlsx]

## Sheet: Sheet1
Gene ID	Location	Genome	Taxonomy							Strand	Start	End	Length (bp)	Swiss-Prot Hit	Swiss-Prot Description	COG ID	COG Type	KO ID	KEGG Name	KO Description	Pathway level3	Family	Class	ARO Name	CARD_Short_Name	ARO Description	Drug_class	Antibiotic class	MRG/BRG Name	Compound	Vfs	Vfcategory	Realste genes	MGEs	MGE_type
MAG160_gene0073	D55_k97_921895_ORF73	MAG160	d__Bacteria	p__Bacillota	c__Bacilli	o__Erysipelotrichales	f__Coprobacillaceae	g__Intestinibaculum	s__Intestinibaculum porci	+	104	4822	4719	sp|Q9I310|Y1727_PSEAE	Uncharacterized signaling protein PA1727 OS=Pseudomonas aeruginosa (strain ATCC 15692 / DSM 22644 / CIP 104116 / JCM 14847 / LMG 12228 / 1C / PRS 101 / PAO1) OX=208964 GN=PA1727 PE=1 SV=1	COG2199	T	K14051	pdeR	c-di-GMP phosphodiesterase Gmr [EC:3.1.4.52]	Quorum sensing;Biofilm formation - Escherichia coli	-	-	-	-	-	-	-	-	-	PlcR-PapR quorum sensing (VF0660)	Biofilm	papR	-	-
MAG160_gene0169	D55_k97_220238_ORF167	MAG160	d__Bacteria	p__Bacillota	c__Bacilli	o__Erysipelotrichales	f__Coprobacillaceae	g__Intestinibaculum	s__Intestinibaculum porci	-	12752	11118	1635	sp|P26906|DPPE_BACSU	Dipeptide-binding protein DppE OS=Bacillus subtilis (strain 168) OX=224308 GN=dppE PE=1 SV=4	COG4166	E	K15580	oppA	oligopeptide transport system substrate-binding protein	Quorum sensing;beta-Lactam resistance;ABC transporters	-	-	-	-	-	-	-	nikA	Ni	Oligopeptide-binding protein oppA (VF0786)	Nutritional/Metabolic factor	oppA	-	-
MAG160_gene0558	D55_k97_570425_ORF552	MAG160	d__Bacteria	p__Bacillota	c__Bacilli	o__Erysipelotrichales	f__Coprobacillaceae	g__Erysipelotrichales_UCG-002	s__Intestinibaculum porci	+	1602	2963	1362	sp|Q06862|ACCC_NOSS1	Biotin carboxylase OS=Nostoc sp. (strain PCC 7120 / SAG 25.82 / UTEX 2576) OX=103690 GN=accC PE=3 SV=1	COG4770	I	K01961	accC	acetyl-CoA carboxylase, biotin carboxylase subunit [EC:6.4.1.2 6.3.4.14]	Carbon metabolism;Fatty acid biosynthesis;Pyruvate metabolism;Biosynthesis of secondary metabolites;Propanoate metabolism;Metabolic pathways;Carbon fixation pathways in prokaryotes;Fatty acid metabolism;Microbial metabolism in diverse environments	-	-	-	-	-	-	-	-	-	-	-	-	-	-
MAG160_gene0736	D55_k97_285280_ORF724	MAG160	d__Bacteria	p__Bacillota	c__Bacilli	o__Erysipelotrichales	f__Coprobacillaceae	g__Erysipelotrichales_UCG-002	s__Intestinibaculum porci	+	923	1933	1011	sp|Q59309|G3P_CLOPA	Glyceraldehyde-3-phosphate dehydrogenase OS=Clostridium pasteurianum OX=1501 GN=gap PE=1 SV=1	COG0057	G	K00134	gapA	glyceraldehyde 3-phosphate dehydrogenase (phosphorylating) [EC:1.2.1.12]	Carbon metabolism;Biosynthesis of amino acids;Pathogenic Escherichia coli infection;Glycolysis / Gluconeogenesis;Diabetic cardiomyopathy;HIF-1 signaling pathway;Biosynthesis of secondary metabolites;Carbon fixation in photosynthetic organisms;Metabolic pathways;Alzheimer disease;Salmonella infection;Microbial metabolism in diverse environments	-	-	-	-	-	-	-	-	-	Streptococcal plasmin receptor/GAPDH (VF1042)	Adherence	plr/gapA	-	-
MAG160_gene0880	D55_k97_627481_ORF866	MAG160	d__Bacteria	p__Bacillota	c__Bacilli	o__Erysipelotrichales	f__Coprobacillaceae	g__Erysipelotrichales_UCG-002	s__Intestinibaculum porci	-	2126	1035	1092	sp|P24136|OPPD_BACSU	Oligopeptide transport ATP-binding protein OppD OS=Bacillus subtilis (strain 168) OX=224308 GN=oppD PE=2 SV=2	COG0444	E;P	K15583	oppD	oligopeptide transport system ATP-binding protein	Quorum sensing;beta-Lactam resistance;ABC transporters	-	-	-	-	-	-	-	nikD	Ni	Capsule (VF0881)	Immune modulation	oppF	IS605	transposase
MAG160_gene0883	D55_k97_627481_ORF869	MAG160	d__Bacteria	p__Bacillota	c__Bacilli	o__Erysipelotrichales	f__Coprobacillaceae	g__Erysipelotrichales_UCG-002	s__Intestinibaculum porci	-	5697	4111	1587	sp|A2RI74|DPPA_LACLM	Dipeptide-binding protein OS=Lactococcus lactis subsp. cremoris (strain MG1363) OX=416870 GN=dppA PE=1 SV=1	COG4166	E	K15580	oppA	oligopeptide transport system substrate-binding protein	Quorum sensing;beta-Lactam resistance;ABC transporters	-	-	-	-	-	-	-	-	-	Oligopeptide-binding protein oppA (VF0786)	Nutritional/Metabolic factor	oppA	-	-
MAG160_gene1176	D55_k97_454667_ORF1157	MAG160	d__Bacteria	p__Bacillota	c__Bacilli	o__Erysipelotrichales	f__Coprobacillaceae	g__Erysipelotrichales_UCG-002	s__Intestinibaculum porci	-	1787	162	1626	sp|A2RI74|DPPA_LACLM	Dipeptide-binding protein OS=Lactococcus lactis subsp. cremoris (strain MG1363) OX=416870 GN=dppA PE=1 SV=1	COG4166	E	K15580	oppA	oligopeptide transport system substrate-binding protein	Quorum sensing;beta-Lactam resistance;ABC transporters	-	-	-	-	-	-	-	nikA	Ni	Oligopeptide-binding protein oppA (VF0786)	Nutritional/Metabolic factor	oppA	-	-
MAG160_gene1235	D55_k97_621641_ORF1216	MAG160	d__Bacteria	p__Bacillota	c__Bacilli	o__Erysipelotrichales	f__Coprobacillaceae	g__Erysipelotrichales_UCG-002	s__Intestinibaculum porci	+	1821	3098	1278	sp|A5MZ75|LEUC_CLOK5	3-isopropylmalate dehydratase large subunit OS=Clostridium kluyveri (strain ATCC 8527 / DSM 555 / NCIMB 10680) OX=431943 GN=leuC PE=3 SV=1	COG0065	E	K01703	leuC	3-isopropylmalate/(R)-2-methylmalate dehydratase large subunit [EC:4.2.1.33 4.2.1.35]	Valine, leucine and isoleucine biosynthesis;Metabolic pathways;Biosynthesis of amino acids;Biosynthesis of secondary metabolites;Glucosinolate biosynthesis;C5-Branched dibasic acid metabolism;2-Oxocarboxylic acid metabolism	-	-	-	-	-	-	-	acn	Fe	-	-	-	-	-
MAG160_gene1365	D55_k97_767290_ORF1346	MAG160	d__Bacteria	p__Bacillota	c__Bacilli	o__Erysipelotrichales	f__Coprobacillaceae	g__Erysipelotrichales_UCG-002	s__Intestinibaculum porci	-	3655	119	3537	sp|Q2RMD6|PFOR_MOOTA	Pyruvate:ferredoxin oxidoreductase OS=Moorella thermoacetica (strain ATCC 39073 / JCM 9320) OX=264732 GN=Moth_0064 PE=1 SV=1	COG0674	C	K03737	nifJ	pyruvate-ferredoxin/flavodoxin oxidoreductase [EC:1.2.7.1 1.2.7.-]	Glycolysis / Gluconeogenesis;2-Oxocarboxylic acid metabolism;Biosynthesis of secondary metabolites;Pyruvate metabolism;Carbon metabolism;Butanoate metabolism;Microbial metabolism in diverse environments;Carbon fixation pathways in prokaryotes;Citrate cycle (TCA cycle);Metabolic pathways	-	-	-	-	-	-	-	-	-	-	-	-	-	-
MAG160_gene1479	D55_k97_56270_ORF1458	MAG160	d__Bacteria	p__Bacillota	c__Bacilli	o__Erysipelotrichales	f__Coprobacillaceae	g__Erysipelotrichales_UCG-002	s__Intestinibaculum porci	-	2047	980	1068	sp|P39576|ILVE2_BACSU	Branched-chain-amino-acid aminotransferase 2 OS=Bacillus subtilis (strain 168) OX=224308 GN=ilvK PE=1 SV=5	COG0115	E;H	K00826	ilvE	branched-chain amino acid aminotransferase [EC:2.6.1.42]	Valine, leucine and isoleucine biosynthesis;Metabolic pathways;Cysteine and methionine metabolism;Glucosinolate biosynthesis;Biosynthesis of cofactors;Biosynthesis of amino acids;Valine, leucine and isoleucine degradation;Pantothenate and CoA biosynthesis;Biosynthesis of secondary metabolites;2-Oxocarboxylic acid metabolism	-	-	-	-	-	-	-	-	-	-	-	-	-	-
MAG160_gene1619	D55_k97_282944_ORF1595	MAG160	d__Bacteria	p__Bacillota	c__Bacilli	o__Erysipelotrichales	f__Coprobacillaceae	g__Erysipelotrichales_UCG-002	s__Intestinibaculum porci	+	388	2019	1632	sp|P24141|OPPA_BACSU	Oligopeptide-binding protein OppA OS=Bacillus subtilis (strain 168) OX=224308 GN=oppA PE=1 SV=1	COG4166	E	K15580	oppA	oligopeptide transport system substrate-binding protein	Quorum sensing;beta-Lactam resistance;ABC transporters	-	-	-	-	-	-	-	-	-	Oligopeptide-binding protein oppA (VF0786)	Nutritional/Metabolic factor	oppA	-	-
MAG160_gene1752	D55_k97_659872_ORF1727	MAG160	d__Bacteria	p__Bacillota	c__Bacilli	o__Erysipelotrichales	f__Coprobacillaceae	g__Erysipelotrichales_UCG-002	s__Intestinibaculum porci	-	2190	1519	672	-	-	COG0637	G	K01838	pgmB	beta-phosphoglucomutase [EC:5.4.2.6]	Starch and sucrose metabolism	-	-	-	-	-	-	-	-	-	-	-	-	-	-
MAG160_gene1800	D55_k97_1103164_ORF1774	MAG160	d__Bacteria	p__Bacillota	c__Bacilli	o__Erysipelotrichales	f__Coprobacillaceae	g__Erysipelotrichales_UCG-002	s__Intestinibaculum porci	+	904	1695	792	-	-	-	-	K12990	rfbF	rhamnosyltransferase [EC:2.4.1.-]	Quorum sensing;Biofilm formation - Pseudomonas aeruginosa	GT2_Glycos_transf_2	GT	-	-	-	-	-	-	-	-	-	-	-	-
MAG160_gene1922	D55_k97_788122_ORF1894	MAG160	d__Bacteria	p__Bacillota	c__Bacilli	o__Erysipelotrichales	f__Coprobacillaceae	g__Erysipelotrichales_UCG-002	s__Intestinibaculum porci	+	556	2178	1623	sp|A2RI74|DPPA_LACLM	Dipeptide-binding protein OS=Lactococcus lactis subsp. cremoris (strain MG1363) OX=416870 GN=dppA PE=1 SV=1	COG4166	E	K15580	oppA	oligopeptide transport system substrate-binding protein	Quorum sensing;beta-Lactam resistance;ABC transporters	-	-	-	-	-	-	-	-	-	Oligopeptide-binding protein oppA (VF0786)	Nutritional/Metabolic factor	oppA	-	-
MAG160_gene1955	D55_k97_1350251_ORF1921	MAG160	d__Bacteria	p__Bacillota	c__Bacilli	o__Erysipelotrichales	f__Coprobacillaceae	g__Erysipelotrichales_UCG-002	s__Intestinibaculum porci	-	2041	1178	864	sp|O34948|YKWC_BACSU	Uncharacterized oxidoreductase YkwC OS=Bacillus subtilis (strain 168) OX=224308 GN=ykwC PE=1 SV=1	COG2084	I	K00020	mmsB	3-hydroxyisobutyrate dehydrogenase [EC:1.1.1.31]	Valine, leucine and isoleucine degradation;Metabolic pathways	-	-	-	-	-	-	-	-	-	-	-	-	-	-
MAG160_gene2092	D55_k97_1282969_ORF2055	MAG160	d__Bacteria	p__Bacillota	c__Bacilli	o__Erysipelotrichales	f__Coprobacillaceae	g__Erysipelotrichales_UCG-002	s__Intestinibaculum porci	-	1709	228	1482	sp|Q2YV11|ALDA_STAAB	Putative aldehyde dehydrogenase AldA OS=Staphylococcus aureus (strain bovine RF122 / ET3-1) OX=273036 GN=aldA PE=3 SV=1	COG1012	I	K00128	-	aldehyde dehydrogenase (NAD+) [EC:1.2.1.3]	Valine, leucine and isoleucine degradation;Lysine degradation;Biosynthesis of secondary metabolites;Glycolysis / Gluconeogenesis;Limonene degradation;Glycerolipid metabolism;Microbial metabolism in diverse environments;Arginine and proline metabolism;Tryptophan metabolism;Pyruvate metabolism;Pantothenate and CoA biosynthesis;Ascorbate and aldarate metabolism;beta-Alanine metabolism;Insect hormone…	-	-	-	-	-	-	-	-	-	-	-	-	-	-
MAG160_gene2156	D55_k97_446080_ORF2117	MAG160	d__Bacteria	p__Bacillota	c__Bacilli	o__Erysipelotrichales	f__Coprobacillaceae	g__Erysipelotrichales_UCG-002	s__Intestinibaculum porci	+	319	1521	1203	sp|Q9WYJ1|TSAL_THEMA	L-threonine ammonia-lyase OS=Thermotoga maritima (strain ATCC 43589 / DSM 3109 / JCM 10099 / NBRC 100826 / MSB8) OX=243274 GN=TM_0356 PE=1 SV=1	COG1171	E	K01754	ilvA	threonine dehydratase [EC:4.3.1.19]	Valine, leucine and isoleucine biosynthesis;Metabolic pathways;Biosynthesis of amino acids;Glycine, serine and threonine metabolism;Carbon metabolism;Biosynthesis of secondary metabolites	-	-	-	-	-	-	-	-	-	-	-	-	-	-
MAG160_gene2184	D55_k97_506892_ORF2145	MAG160	d__Bacteria	p__Bacillota	c__Bacilli	o__Erysipelotrichales	f__Coprobacillaceae	g__Erysipelotrichales_UCG-002	s__Intestinibaculum porci	+	307	1656	1350	sp|Q2FWX9|DIALD_STAA8	4,4'-diaponeurosporen-aldehyde dehydrogenase OS=Staphylococcus aureus (strain NCTC 8325 / PS 47) OX=93061 GN=aldH1 PE=1 SV=1	COG1012	I	K00128	-	aldehyde dehydrogenase (NAD+) [EC:1.2.1.3]	Valine, leucine and isoleucine degradation;Lysine degradation;Biosynthesis of secondary metabolites;Glycolysis / Gluconeogenesis;Limonene degradation;Glycerolipid metabolism;Microbial metabolism in diverse environments;Arginine and proline metabolism;Tryptophan metabolism;Pyruvate metabolism;Pantothenate and CoA biosynthesis;Ascorbate and aldarate metabolism;beta-Alanine metabolism;Insect hormone…	-	-	-	-	-	-	-	-	-	-	-	-	-	-
MAG160_gene2249	D55_k97_792925_ORF2208	MAG160	d__Bacteria	p__Bacillota	c__Bacilli	o__Erysipelotrichales	f__Coprobacillaceae	g__Erysipelotrichales_UCG-002	s__Intestinibaculum porci	+	665	1564	900	sp|P26832|Y188_CLOPE	Uncharacterized protein CPE0188 OS=Clostridium perfringens (strain 13 / Type A) OX=195102 GN=CPE0188 PE=3 SV=2	COG1940	G;K	K25026	glk	glucokinase [EC:2.7.1.2]	Glycolysis / Gluconeogenesis;Biosynthesis of secondary metabolites;Carbon metabolism;Biosynthesis of nucleotide sugars;Neomycin, kanamycin and gentamicin biosynthesis;Microbial metabolism in diverse environments;Streptomycin biosynthesis;Amino sugar and nucleotide sugar metabolism;Galactose metabolism;Starch and sucrose metabolism;Metabolic pathways	-	-	-	-	-	-	-	-	-	-	-	-	-	-
MAG168_gene0136	D46_k97_1372846_ORF134	MAG168	d__Bacteria	p__Bacillota	c__Bacilli	o__Erysipelotrichales	f__Coprobacillaceae	g__Erysipelotrichales_UCG-002	s__Intestinibaculum porci	-	3386	1752	1635	sp|P26906|DPPE_BACSU	Dipeptide-binding protein DppE OS=Bacillus subtilis (strain 168) OX=224308 GN=dppE PE=1 SV=4	COG4166	E	K15580	oppA	oligopeptide transport system substrate-binding protein	Quorum sensing;beta-Lactam resistance;ABC transporters	-	-	-	-	-	-	-	nikA	Ni	Oligopeptide-binding protein oppA (VF0786)	Nutritional/Metabolic factor	oppA	-	-
MAG168_gene0141	D46_k97_1372846_ORF138	MAG168	d__Bacteria	p__Bacillota	c__Bacilli	o__Erysipelotrichales	f__Coprobacillaceae	g__Erysipelotrichales_UCG-002	s__Intestinibaculum porci	-	9549	8245	1305	sp|P24141|OPPA_BACSU	Oligopeptide-binding protein OppA OS=Bacillus subtilis (strain 168) OX=224308 GN=oppA PE=1 SV=1	COG4166	E	K15580	oppA	oligopeptide transport system substrate-binding protein	Quorum sensing;beta-Lactam resistance;ABC transporters	-	-	-	-	-	-	-	-	-	Oligopeptide-binding protein oppA (VF0786)	Nutritional/Metabolic factor	oppA	-	-
MAG168_gene0535	D46_k97_703764_ORF529	MAG168	d__Bacteria	p__Bacillota	c__Bacilli	o__Erysipelotrichales	f__Coprobacillaceae	g__Erysipelotrichales_UCG-002	s__Intestinibaculum porci	-	217	2	216	sp|B8ZKS3|FSA_STRPJ	Probable fructose-6-phosphate aldolase OS=Streptococcus pneumoniae (strain ATCC 700669 / Spain 23F-1) OX=561276 GN=fsa PE=3 SV=1	COG0176	G	K00616	talB	transaldolase [EC:2.2.1.2]	Carbon metabolism;Metabolic pathways;Biosynthesis of amino acids;Microbial metabolism in diverse environments;Pentose phosphate pathway;Biosynthesis of secondary metabolites	-	-	-	-	-	-	-	-	-	-	-	-	-	-
MAG168_gene0586	D46_k97_787500_ORF580	MAG168	d__Bacteria	p__Bacillota	c__Bacilli	o__Erysipelotrichales	f__Coprobacillaceae	g__Erysipelotrichales_UCG-002	s__Intestinibaculum porci	-	4756	3125	1632	sp|P24141|OPPA_BACSU	Oligopeptide-binding protein OppA OS=Bacillus subtilis (strain 168) OX=224308 GN=oppA PE=1 SV=1	COG4166	E	K15580	oppA	oligopeptide transport system substrate-binding protein	Quorum sensing;beta-Lactam resistance;ABC transporters	-	-	-	-	-	-	-	-	-	Oligopeptide-binding protein oppA (VF0786)	Nutritional/Metabolic factor	oppA	-	-
MAG168_gene0602	D46_k97_234985_ORF594	MAG168	d__Bacteria	p__Bacillota	c__Bacilli	o__Erysipelotrichales	f__Coprobacillaceae	g__Erysipelotrichales_UCG-002	s__Intestinibaculum porci	+	32	3568	3537	sp|Q2RMD6|PFOR_MOOTA	Pyruvate:ferredoxin oxidoreductase OS=Moorella thermoacetica (strain ATCC 39073 / JCM 9320) OX=264732 GN=Moth_0064 PE=1 SV=1	COG0674	C	K03737	nifJ	pyruvate-ferredoxin/flavodoxin oxidoreductase [EC:1.2.7.1 1.2.7.-]	Glycolysis / Gluconeogenesis;2-Oxocarboxylic acid metabolism;Biosynthesis of secondary metabolites;Pyruvate metabolism;Carbon metabolism;Butanoate metabolism;Microbial metabolism in diverse environments;Carbon fixation pathways in prokaryotes;Citrate cycle (TCA cycle);Metabolic pathways	-	-	-	-	-	-	-	-	-	-	-	-	-	-
MAG168_gene0719	D46_k97_748944_ORF711	MAG168	d__Bacteria	p__Bacillota	c__Bacilli	o__Erysipelotrichales	f__Coprobacillaceae	g__Erysipelotrichales_UCG-002	s__Intestinibaculum porci	-	2926	1292	1635	sp|A2RI74|DPPA_LACLM	Dipeptide-binding protein OS=Lactococcus lactis subsp. cremoris (strain MG1363) OX=416870 GN=dppA PE=1 SV=1	COG4166	E	K15580	oppA	oligopeptide transport system substrate-binding protein	Quorum sensing;beta-Lactam resistance;ABC transporters	-	-	-	-	-	-	-	-	-	Oligopeptide-binding protein oppA (VF0786)	Nutritional/Metabolic factor	oppA	-	-
MAG168_gene0809	D46_k97_1294802_ORF798	MAG168	d__Bacteria	p__Bacillota	c__Bacilli	o__Erysipelotrichales	f__Coprobacillaceae	g__Erysipelotrichales_UCG-002	s__Intestinibaculum porci	-	1792	167	1626	sp|A2RI74|DPPA_LACLM	Dipeptide-binding protein OS=Lactococcus lactis subsp. cremoris (strain MG1363) OX=416870 GN=dppA PE=1 SV=1	COG4166	E	K15580	oppA	oligopeptide transport system substrate-binding protein	Quorum sensing;beta-Lactam resistance;ABC transporters	-	-	-	-	-	-	-	nikA	Ni	Oligopeptide-binding protein oppA (VF0786)	Nutritional/Metabolic factor	oppA	-	-
MAG168_gene0939	D46_k97_8080_ORF928	MAG168	d__Bacteria	p__Bacillota	c__Bacilli	o__Erysipelotrichales	f__Coprobacillaceae	g__Erysipelotrichales_UCG-002	s__Intestinibaculum porci	+	3370	3948	579	sp|Q97FP8|G6PI_CLOAB	Glucose-6-phosphate isomerase OS=Clostridium acetobutylicum (strain ATCC 824 / DSM 792 / JCM 1419 / LMG 5710 / VKM B-1787) OX=272562 GN=pgi PE=3 SV=1	COG0166	G	K01810	pgi	glucose-6-phosphate isomerase [EC:5.3.1.9]	Carbon metabolism;Biosynthesis of nucleotide sugars;Glycolysis / Gluconeogenesis;Biosynthesis of secondary metabolites;Pentose phosphate pathway;Metabolic pathways;Microbial metabolism in diverse environments;Amino sugar and nucleotide sugar metabolism;Starch and sucrose metabolism	-	-	-	-	-	-	-	-	-	-	-	-	-	-
MAG168_gene1144	D46_k97_718622_ORF1133	MAG168	d__Bacteria	p__Bacillota	c__Bacilli	o__Erysipelotrichales	f__Coprobacillaceae	g__Erysipelotrichales_UCG-002	s__Intestinibaculum porci	+	2	928	927	sp|Q06862|ACCC_NOSS1	Biotin carboxylase OS=Nostoc sp. (strain PCC 7120 / SAG 25.82 / UTEX 2576) OX=103690 GN=accC PE=3 SV=1	COG4770	I	K01961	accC	acetyl-CoA carboxylase, biotin carboxylase subunit [EC:6.4.1.2 6.3.4.14]	Carbon metabolism;Fatty acid biosynthesis;Pyruvate metabolism;Biosynthesis of secondary metabolites;Propanoate metabolism;Metabolic pathways;Carbon fixation pathways in prokaryotes;Fatty acid metabolism;Microbial metabolism in diverse environments	-	-	-	-	-	-	-	-	-	-	-	-	-	-
MAG168_gene1225	D46_k97_427861_ORF1214	MAG168	d__Bacteria	p__Bacillota	c__Bacilli	o__Erysipelotrichales	f__Coprobacillaceae	g__Erysipelotrichales_UCG-002	s__Intestinibaculum porci	-	1293	16	1278	sp|A5MZ75|LEUC_CLOK5	3-isopropylmalate dehydratase large subunit OS=Clostridium kluyveri (strain ATCC 8527 / DSM 555 / NCIMB 10680) OX=431943 GN=leuC PE=3 SV=1	COG0065	E	K01703	leuC	3-isopropylmalate/(R)-2-methylmalate dehydratase large subunit [EC:4.2.1.33 4.2.1.35]	Valine, leucine and isoleucine biosynthesis;Metabolic pathways;Biosynthesis of amino acids;Biosynthesis of secondary metabolites;Glucosinolate biosynthesis;C5-Branched dibasic acid metabolism;2-Oxocarboxylic acid metabolism	-	-	-	-	-	-	-	acn	Fe	-	-	-	-	-
MAG168_gene1469	D46_k97_846715_ORF1456	MAG168	d__Bacteria	p__Bacillota	c__Bacilli	o__Erysipelotrichales	f__Coprobacillaceae	g__Erysipelotrichales_UCG-002	s__Intestinibaculum porci	-	2637	1786	852	-	-	COG4166	E	K15580	oppA	oligopeptide transport system substrate-binding protein	Quorum sensing;beta-Lactam resistance;ABC transporters	-	-	-	-	-	-	-	-	-	Oligopeptide-binding protein oppA (VF0786)	Nutritional/Metabolic factor	oppA	-	-
MAG168_gene1471	D46_k97_11697_ORF1458	MAG168	d__Bacteria	p__Bacillota	c__Bacilli	o__Erysipelotrichales	f__Coprobacillaceae	g__Erysipelotrichales_UCG-002	s__Intestinibaculum porci	-	2624	1833	792	-	-	-	-	K12990	rfbF	rhamnosyltransferase [EC:2.4.1.-]	Quorum sensing;Biofilm formation - Pseudomonas aeruginosa	GT2_Glycos_transf_2	GT	-	-	-	-	-	-	-	-	-	-	-	-
MAG168_gene1536	D46_k97_1652272_ORF1521	MAG168	d__Bacteria	p__Bacillota	c__Bacilli	o__Erysipelotrichales	f__Coprobacillaceae	g__Erysipelotrichales_UCG-002	s__Intestinibaculum porci	-	2541	1942	600	sp|Q2YV11|ALDA_STAAB	Putative aldehyde dehydrogenase AldA OS=Staphylococcus aureus (strain bovine RF122 / ET3-1) OX=273036 GN=aldA PE=3 SV=1	COG1012	I	K00128	-	aldehyde dehydrogenase (NAD+) [EC:1.2.1.3]	Valine, leucine and isoleucine degradation;Lysine degradation;Biosynthesis of secondary metabolites;Glycolysis / Gluconeogenesis;Limonene degradation;Glycerolipid metabolism;Microbial metabolism in diverse environments;Arginine and proline metabolism;Tryptophan metabolism;Pyruvate metabolism;Pantothenate and CoA biosynthesis;Ascorbate and aldarate metabolism;beta-Alanine metabolism;Insect hormone…	-	-	-	-	-	-	-	-	-	-	-	-	-	-
MAG168_gene1562	D46_k97_529878_ORF1547	MAG168	d__Bacteria	p__Bacillota	c__Bacilli	o__Erysipelotrichales	f__Coprobacillaceae	g__Erysipelotrichales_UCG-002	s__Intestinibaculum porci	-	2496	2293	204	sp|P52987|G3P_LACLA	Glyceraldehyde-3-phosphate dehydrogenase OS=Lactococcus lactis subsp. lactis (strain IL1403) OX=272623 GN=gap PE=3 SV=2	COG0057	G	K00134	gapA	glyceraldehyde 3-phosphate dehydrogenase (phosphorylating) [EC:1.2.1.12]	Carbon metabolism;Biosynthesis of amino acids;Pathogenic Escherichia coli infection;Glycolysis / Gluconeogenesis;Diabetic cardiomyopathy;HIF-1 signaling pathway;Biosynthesis of secondary metabolites;Carbon fixation in photosynthetic organisms;Metabolic pathways;Alzheimer disease;Salmonella infection;Microbial metabolism in diverse environments	-	-	-	-	-	-	-	-	-	Streptococcal plasmin receptor/GAPDH (VF1042)	Adherence	plr/gapA	-	-
MAG168_gene1642	D46_k97_911046_ORF1627	MAG168	d__Bacteria	p__Bacillota	c__Bacilli	o__Erysipelotrichales	f__Coprobacillaceae	g__Erysipelotrichales_UCG-002	s__Intestinibaculum porci	+	1018	2367	1350	sp|Q2FWX9|DIALD_STAA8	4,4'-diaponeurosporen-aldehyde dehydrogenase OS=Staphylococcus aureus (strain NCTC 8325 / PS 47) OX=93061 GN=aldH1 PE=1 SV=1	COG1012	I	K00128	-	aldehyde dehydrogenase (NAD+) [EC:1.2.1.3]	Valine, leucine and isoleucine degradation;Lysine degradation;Biosynthesis of secondary metabolites;Glycolysis / Gluconeogenesis;Limonene degradation;Glycerolipid metabolism;Microbial metabolism in diverse environments;Arginine and proline metabolism;Tryptophan metabolism;Pyruvate metabolism;Pantothenate and CoA biosynthesis;Ascorbate and aldarate metabolism;beta-Alanine metabolism;Insect hormone…	-	-	-	-	-	-	-	-	-	-	-	-	-	-
MAG168_gene1644	D46_k97_764766_ORF1629	MAG168	d__Bacteria	p__Bacillota	c__Bacilli	o__Erysipelotrichales	f__Coprobacillaceae	g__Erysipelotrichales_UCG-002	s__Intestinibaculum porci	-	1889	822	1068	sp|P39576|ILVE2_BACSU	Branched-chain-amino-acid aminotransferase 2 OS=Bacillus subtilis (strain 168) OX=224308 GN=ilvK PE=1 SV=5	COG0115	E;H	K00826	ilvE	branched-chain amino acid aminotransferase [EC:2.6.1.42]	Valine, leucine and isoleucine biosynthesis;Metabolic pathways;Cysteine and methionine metabolism;Glucosinolate biosynthesis;Biosynthesis of cofactors;Biosynthesis of amino acids;Valine, leucine and isoleucine degradation;Pantothenate and CoA biosynthesis;Biosynthesis of secondary metabolites;2-Oxocarboxylic acid metabolism	-	-	-	-	-	-	-	-	-	-	-	-	-	-
MAG168_gene2072	D46_k97_1343325_ORF2049	MAG168	d__Bacteria	p__Bacillota	c__Bacilli	o__Erysipelotrichales	f__Coprobacillaceae	g__Erysipelotrichales_UCG-002	s__Intestinibaculum porci	+	1033	1728	696	sp|Q59309|G3P_CLOPA	Glyceraldehyde-3-phosphate dehydrogenase OS=Clostridium pasteurianum OX=1501 GN=gap PE=1 SV=1	COG0057	G	K00134	gapA	glyceraldehyde 3-phosphate dehydrogenase (phosphorylating) [EC:1.2.1.12]	Carbon metabolism;Biosynthesis of amino acids;Pathogenic Escherichia coli infection;Glycolysis / Gluconeogenesis;Diabetic cardiomyopathy;HIF-1 signaling pathway;Biosynthesis of secondary metabolites;Carbon fixation in photosynthetic organisms;Metabolic pathways;Alzheimer disease;Salmonella infection;Microbial metabolism in diverse environments	-	-	-	-	-	-	-	-	-	Streptococcal plasmin receptor/GAPDH (VF1042)	Adherence	plr/gapA	-	-
MAG168_gene2116	D46_k97_338397_ORF2093	MAG168	d__Bacteria	p__Bacillota	c__Bacilli	o__Erysipelotrichales	f__Coprobacillaceae	g__Erysipelotrichales_UCG-002	s__Intestinibaculum porci	-	493	2	492	sp|P18791|AMIA_STRPN	Oligopeptide-binding protein AmiA OS=Streptococcus pneumoniae serotype 4 (strain ATCC BAA-334 / TIGR4) OX=170187 GN=amiA PE=1 SV=3	COG4166	E	K15580	oppA	oligopeptide transport system substrate-binding protein	Quorum sensing;beta-Lactam resistance;ABC transporters	-	-	-	-	-	-	-	-	-	-	-	-	-	-
MAG168_gene2230	D46_k97_1402730_ORF2206	MAG168	d__Bacteria	p__Bacillota	c__Bacilli	o__Erysipelotrichales	f__Coprobacillaceae	g__Erysipelotrichales_UCG-002	s__Intestinibaculum porci	+	805	1551	747	sp|A2RI74|DPPA_LACLM	Dipeptide-binding protein OS=Lactococcus lactis subsp. cremoris (strain MG1363) OX=416870 GN=dppA PE=1 SV=1	COG4166	E	K15580	oppA	oligopeptide transport system substrate-binding protein	Quorum sensing;beta-Lactam resistance;ABC transporters	-	-	-	-	-	-	-	-	-	-	-	-	-	-
