# Supplementary material
Source: Research Square preprint supplement (doi:10.21203/rs.3.rs-9101224/v1)
Supplement: Supplementary file 2 [file 9b4efcf82859e04fd01d54fb.docx]

**Correlation Analysis Between Species Prevalence and Relative Abundance**

**
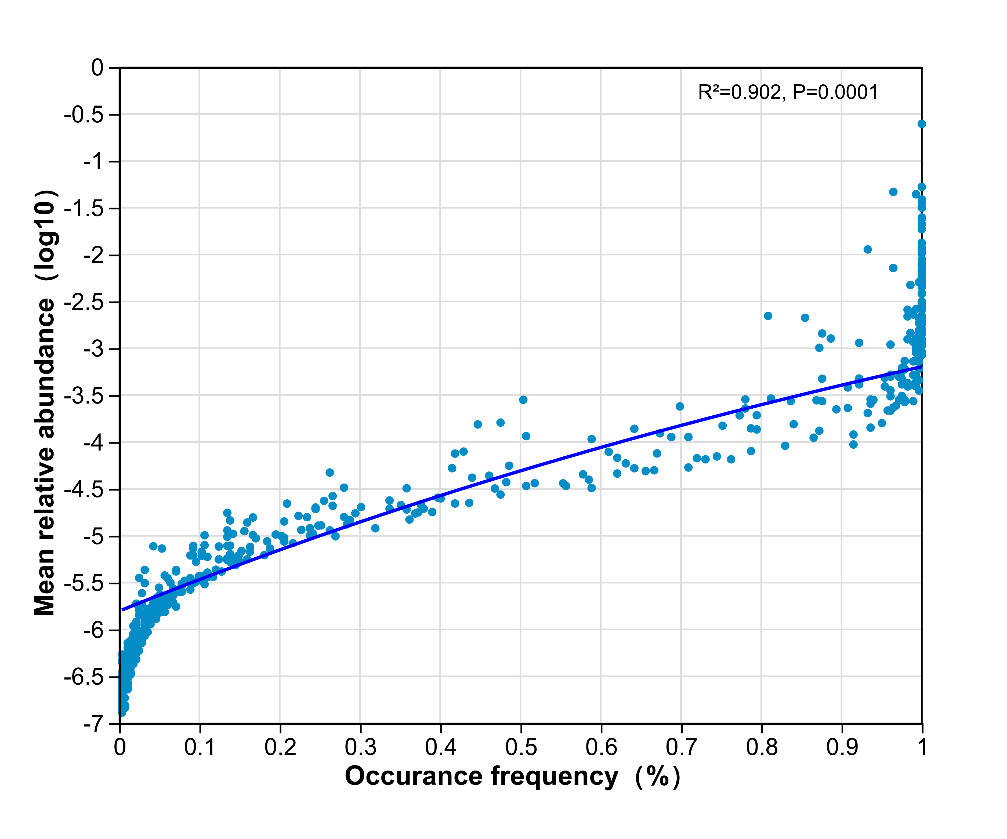
**

Fig.S3 A strong positive correlation was observed between species prevalence and relative abundance, with R² = 0.902, p < 0.05. Each point in the plot represents one ASV. The x-axis indicates prevalence, and the y-axis shows the log₁₀-transformed mean relative abundance across all samples.
