# Supplementary material
Source: Research Square preprint supplement (doi:10.21203/rs.3.rs-9101224/v1)
Supplement: Supplementary file 3 [file 7baebafab5cd594bafa311a7.xlsx]

## Sheet: Sheet1
SNP	CHROM	POS	REF	ALT	MAF	Effect	SE	P_value	Microbiota_feature	Gene name
1_6183647	1	6183647	G	A	0.0294118	0.390151	0.0705109	7.8435e-08	g__Ruminococcus	GRIK1
1_6455343	1	6455343	G	A	0.0313725	0.39777	0.0684147	1.83065e-08	g__Ruminococcus	GRIK1
1_6462736	1	6462736	C	G	0.0294118	0.43184	0.070511	3.45741e-09	g__Ruminococcus
1_6469360	1	6469360	C	T	0.0333333	0.365329	0.066511	9.62922e-08	g__Ruminococcus
1_6500881	1	6500881	C	T	0.0294118	0.43184	0.070511	3.45741e-09	g__Ruminococcus	GRIK1
1_116335676	1	116335676	G	A	0.0627451	0.115558	0.0202541	2.74996e-10	s__Prevotella_ruminicola	SUCNR1
1_124090593	1	124090593	C	T	0.00392157	0.651551	0.0759514	5.69132e-18	s__Prevotella_ruminicola
1_6462736	1	6462736	C	G	0.0294118	0.333261	0.0422705	3.59582e-16	g__Ruminococcus	GRIK1
1_6161791	1	6161791	G	A	0.0313725	0.364284	0.0646105	4.5819e-08	g__Bifidobacteriums	GRIK1
1_6183647	1	6183647	G	A	0.0294118	0.390158	0.0662552	1.23308e-08	g__norank_f_ruminantium_group	GRIK1
1_6455343	1	6455343	G	A	0.0313725	0.397774	0.0638251	1.91068e-09	g__Olsenella_umbonata
1_6462736	1	6462736	C	G	0.0294118	0.431843	0.0652251	2.12584e-10	g__Olsenella_umbonata
1_6469360	1	6469360	C	T	0.0333333	0.365332	0.0625593	1.59851e-08	g__Erysipolotrichaceae
1_6500881	1	6500881	C	T	0.0294118	0.431843	0.0652251	2.12584e-10	g__Erysipolotrichaceae	GRIK1
2_16447322	2	16447322	A	C	0.113725	0.130136	0.0228122	3.2463e-08	g__Clostridia_UCG.014.	CWC22
2_133192931	2	133192931	C	T	0.0196078	0.871443	0.154153	4.24121e-08	g__unclassified_f__Muribaculaceae	PLA2G2A
2_133728573	2	133728573	G	A	0.0196078	0.871443	0.154153	4.24121e-08	g__unclassified_f__Muribaculaceae	PAX7
2_16447322	2	16447322	A	C	0.113725	0.124168	0.0197078	1.30816e-09	g__unclassified_o__Clostridia_UCG.014	CWC22
2_16452617	2	16452617	A	T	0.139216	0.103782	0.0187208	7.43695e-08	g__unclassified_o__Clostridia_UCG.014	-
2_16472271	2	16472271	C	A	0.133333	0.104613	0.0189189	7.99082e-08	g__unclassified_o__Clostridia_UCG.014	-
2_16472953	2	16472953	G	A	0.131373	0.110928	0.019188	2.17766e-08	g__unclassified_o__Clostridia_UCG.014	-
2_16474250	2	16474250	C	G	0.139216	0.110466	0.0182607	5.20226e-09	g__unclassified_o__Clostridia_UCG.014	-
2_16475166	2	16475166	G	C	0.133333	0.104613	0.0189189	7.99082e-08	g__unclassified_o__Clostridia_UCG.014	-
2_16475693	2	16475693	T	G	0.131373	0.105291	0.0189803	7.29571e-08	g__unclassified_o__Clostridia_UCG.014	CWC22
2_16477238	2	16477238	T	C	0.139216	0.110466	0.0182607	5.20226e-09	g__unclassified_o__Clostridia_UCG.014	-
2_16478088	2	16478088	A	G	0.131373	0.107118	0.0189398	4.18468e-08	g__unclassified_o__Clostridia_UCG.014	-
2_16478225	2	16478225	T	C	0.139216	0.110466	0.0182607	5.20226e-09	g__unclassified_o__Clostridia_UCG.014	-
2_16478397	2	16478397	C	G	0.107843	0.117772	0.0201904	1.65603e-08	g__unclassified_o__Clostridia_UCG.014	CWC22
2_16478479	2	16478479	G	A	0.139216	0.110466	0.0182607	5.20226e-09	g__unclassified_o__Clostridia_UCG.014	CWC22
2_16478896	2	16478896	T	G	0.139216	0.110466	0.0182607	5.20226e-09	g__unclassified_o__Clostridia_UCG.014	CWC22
2_133192931	2	133192931	C	T	0.0196078	0.871444	0.144413	5.64246e-09	g__uncultured_rumen_bacterium_g__unclassified_f__Muribaculaceae	-
2_133728573	2	133728573	G	A	0.0196078	0.871444	0.144413	5.64246e-09	g__uncultured_rumen_bacterium_g__unclassified_f__Muribaculaceae	PAX7
3_33433833	3	33433833	A	G	0.0784314	0.100198	0.0187197	3.00455e-09	s__Prevotella_ruminicola	LAMTOR5
3_65528992	3	65528992	G	A	0.241176	-0.0551194	0.0113943	9.59945e-09	s__Prevotella_ruminicola	ADGRL4
3_21084062	3	21084062	T	G	0.0705882	0.116548	0.0225938	4.30027e-09	g__Lachnospiraceae_NK3A20_group	SV2A
3_27391974	3	27391974	T	C	0.209804	0.0776307	0.0159071	1.31327e-08	g__Ruminococcus	VANGL1
3_23822	3	23822	A	G	0.133333	0.0859332	0.0159405	1.24058e-09	g__Christensenellaceae_R.7_group	GPR161
4_7092251	4	7092251	G	A	0.0372549	0.178122	0.0344702	1.7003e-09	g__Ruminococcus	ABCA13
4_119578406	4	119578406	A	C	0.239216	-0.103271	0.014908	1.13852e-13	g__Ruminococcus	NCAPG2
5_70357412	5	70357412	C	T	0.00980392	0.493644	0.0878748	5.09381e-08	s__Prevotella_ruminicola	POLR3B
5_70359072	5	70359072	G	A	0.00980392	0.493644	0.0878748	5.09381e-08	s__Prevotella_ruminicola	-
5_74315729	5	74315729	A	G	0.00196078	1.1054	0.19494	3.87677e-08	s__Prevotella_ruminicola	APOL3，MYH9
5_74315729	5	74315729	A	G	0.00196078	3.26418	0.302882	1.55489e-22	g__Lachnospiraceae_NK3A20_group	APOL3，MYH9
5_74315734	5	74315734	T	C	0.00196078	3.26418	0.302882	1.55489e-22	g__Lachnospiraceae_NK3A20_group	APOL3，MYH9
5_74325863	5	74325863	C	A	0.00588235	1.06366	0.175788	5.16369e-09	g__Lachnospiraceae_NK3A20_group	APOL3，MYH9
5_526978	5	526978	G	A	0.170588	0.0698717	0.0133155	1.52048e-09	s__Prevotella_ruminicola	TSPAN8
5_74325863	5	74325863	C	A	0.00588235	0.473992	0.0661281	2.57805e-14	s__Prevotella_ruminicola	APOL3，MYH9
5_74315729	5	74315729	A	G	0.00196078	2.0589	0.206904	2.19854e-22	g__Lachnospiraceae_NK3A20_group	APOL3，MYH9
5_108596848	5	108596848	A	C	0.0509804	0.129101	0.0238944	1.4888e-09	g__Christensenellaceae_R.7_group	CECR2
8_82159253	8	82159253	C	A	0.0176471	0.562772	0.0851119	2.23476e-10	g__Lachnospiraceae_NK3A20_group	PTCH1
8_82190061	8	82190061	C	T	0.0176471	0.562772	0.0851119	2.23476e-10	g__Lachnospiraceae_NK3A20_group	PTCH1
8_87230555	8	87230555	C	A	0.0254902	0.444242	0.0714208	2.04371e-09	g__Lachnospiraceae_NK3A20_group	DIRAS2
8_108632259	8	108632259	C	T	0.0235294	0.415781	0.0741159	5.29975e-08	g__Lachnospiraceae_NK3A20_group	BRINP1
8_108635102	8	108635102	A	C	0.0235294	0.415781	0.0741159	5.29975e-08	g__Lachnospiraceae_NK3A20_group	BRINP1
8_108639352	8	108639352	C	T	0.0235294	0.415781	0.0741159	5.29975e-08	g__Lachnospiraceae_NK3A20_group	BRINP1
8_108642524	8	108642524	G	A	0.0235294	0.415781	0.0741159	5.29975e-08	g__Lachnospiraceae_NK3A20_group	BRINP1
8_82159253	8	82159253	C	A	0.0176471	0.333411	0.0505628	7.02542e-13	g__Ruminococcus	PTCH1
11_92297909	11	92297909	C	A	0.427451	-0.0959259	0.0149634	7.47337e-12	g__Lachnospiraceae_NK3A20_group	TTLL11
11_77402634	11	77402634	T	C	0.24902	0.060128	0.0123136	1.00754e-08	g__Christensenellaceae_R.7_group	-
11_97349540	11	97349540	A	G	0.0372549	0.132886	0.0271901	3.95964e-08	g__Christensenellaceae_R.7_group	LMX1B
12_74787346	12	74787346	A	G	0.0294118	0.371746	0.067079	7.50298e-08	g__Lachnospiraceae_NK3A20_group	IPO5
12_74835414	12	74835414	G	A	0.0294118	0.371746	0.067079	7.50298e-08	g__Lachnospiraceae_NK3A20_group	IPO5
12_5539056	12	5539056	C	A	0.0372549	0.153058	0.0310955	4.28286e-08	g__Lachnospiraceae_NK3A20_group	PCDH17
13_77067571	13	77067571	G	T	0.00392157	1.60221	0.214787	1.38924e-12	g__Lachnospiraceae_NK3A20_group	STAU1
13_77074597	13	77074597	T	C	0.00392157	1.60221	0.214787	1.38924e-12	g__Lachnospiraceae_NK3A20_group	STAU1
13_77078292	13	77078292	T	A	0.00588235	1.0947	0.175768	1.95527e-09	g__Lachnospiraceae_NK3A20_group	STAU1
13_77107310	13	77107310	C	T	0.00392157	1.60221	0.214787	1.38924e-12	g__Lachnospiraceae_NK3A20_group	STAU1
13_77117108	13	77117108	C	T	0.00588235	1.03464	0.175635	1.2192e-08	g__Lachnospiraceae_NK3A20_group	STAU1
13_77137595	13	77137595	T	C	0.00588235	1.03464	0.175635	1.2192e-08	g__Lachnospiraceae_NK3A20_group	STAU1
13_77141942	13	77141942	T	A	0.00588235	1.03464	0.175635	1.2192e-08	g__Lachnospiraceae_NK3A20_group	STAU1
13_77152108	13	77152108	C	T	0.00588235	1.03464	0.175635	1.2192e-08	g__Lachnospiraceae_NK3A20_group	-
13_77154794	13	77154794	T	G	0.00588235	1.03464	0.175635	1.2192e-08	g__Lachnospiraceae_NK3A20_group	-
13_77159189	13	77159189	G	C	0.00588235	1.03464	0.175635	1.2192e-08	g__Lachnospiraceae_NK3A20_group	-
13_77162182	13	77162182	G	A	0.00588235	1.03464	0.175635	1.2192e-08	g__Lachnospiraceae_NK3A20_group	-
13_77163443	13	77163443	C	T	0.00588235	1.03464	0.175635	1.2192e-08	g__Lachnospiraceae_NK3A20_group	STAU1
13_77167202	13	77167202	C	T	0.00588235	1.03464	0.175635	1.2192e-08	g__Lachnospiraceae_NK3A20_group	STAU1
13_77187406	13	77187406	C	T	0.00588235	1.03464	0.175635	1.2192e-08	g__Lachnospiraceae_NK3A20_group	STAU1
13_77187446	13	77187446	G	A	0.00588235	1.03464	0.175635	1.2192e-08	g__Lachnospiraceae_NK3A20_group	STAU1
13_77768003	13	77768003	A	G	0.00588235	1.01636	0.175811	2.17918e-08	g__Lachnospiraceae_NK3A20_group	STAU1
13_25319929	13	25319929	G	A	0.103922	0.107486	0.0167077	9.734e-13	s__Prevotella_ruminicola	KIAA1217
13_76549530	13	76549530	C	G	0.0137255	0.326699	0.057496	3.65021e-08	f__Prevotellaceae	NCOA3
13_52544378	13	52544378	C	T	0.0137255	1.69433	0.387118	1.82884e-09	g__Succinivibrionaceae_UCG.001	MRPS26
14_55553081	14	55553081	T	C	0.00196078	1.57119	0.251912	1.86027e-09	g__Lachnospiraceae_NK3A20_group	ENY2
14_79936783	14	79936783	A	G	0.0529412	0.207637	0.0312351	2.12159e-12	g__Ruminococcus	-
14_17903264	14	17903264	G	A	0.339216	0.0502679	0.0107752	8.24809e-08	g__Christensenellaceae_R.7_group	HAS2
15_33953830	15	33953830	G	A	0.00196078	1.57119	0.251912	1.86027e-09	g__Lachnospiraceae_NK3A20_group	GRAMD1B
15_82182388	15	82182388	G	A	0.0235294	0.456717	0.070071	3.83569e-10	g__Lachnospiraceae_NK3A20_group	LPXN
15_213896	15	213896	T	A	0.0803922	-0.151085	0.0231765	6.4199e-12	g__Lachnospiraceae_NK3A20_group	-
16_18544611	16	18544611	T	C	0.00784314	2.08066	0.373495	6.47519e-08	g__Succiniclasticum	KCTD3，USH2A
16_18544611	16	18544611	T	C	0.00784314	2.08786	0.352149	9.95121e-09	g__Succiniclasticum	KCTD3，USH2A
17_43231254	17	43231254	A	G	0.235294	0.0992911	0.0182383	4.86654e-10	g__Ruminococcus	TDO2
17_67609911	17	67609911	A	G	0.0490196	1.04483	0.216189	5.4382e-08	g__Succinivibrionaceae_UCG.001	MN1
17_3990180	17	3990180	G	A	0.0110117632058814	-0.442939	0.022162089270328219	1.25884e-09	g__Erysipolotrichaceae	TLR2
19_40375042	19	40375042	G	A	0.154902	0.109297	0.0182842	3.69036e-11	g__Lachnospiraceae_NK3A20_group	PPP1R1B
19_50285139	19	50285139	A	C	0.045098	0.202496	0.0297286	9.05585e-13	g__Lachnospiraceae_NK3A20_group	CD7
22_37683053	22	37683053	T	C	0.00980392	0.846353	0.136805	2.45852e-09	g__Lachnospiraceae_NK3A20_group	PSMD6
22_37690992	22	37690992	A	G	0.00980392	0.846353	0.136805	2.45852e-09	g__Lachnospiraceae_NK3A20_group	PSMD6
22_37692492	22	37692492	G	A	0.00980392	0.846353	0.136805	2.45852e-09	g__Lachnospiraceae_NK3A20_group	PSMD6
22_37693264	22	37693264	G	A	0.00980392	0.846353	0.136805	2.45852e-09	g__Lachnospiraceae_NK3A20_group	PSMD6
22_37693711	22	37693711	A	G	0.00980392	0.846353	0.136805	2.45852e-09	g__Lachnospiraceae_NK3A20_group	PSMD6
22_37698869	22	37698869	A	C	0.00980392	0.846353	0.136805	2.45852e-09	g__Lachnospiraceae_NK3A20_group	PSMD6
22_37699413	22	37699413	T	C	0.00980392	0.846353	0.136805	2.45852e-09	g__Lachnospiraceae_NK3A20_group	-
22_37710417	22	37710417	T	C	0.00980392	0.846353	0.136805	2.45852e-09	g__Lachnospiraceae_NK3A20_group	-
22_37710433	22	37710433	A	T	0.00980392	0.846353	0.136805	2.45852e-09	g__Lachnospiraceae_NK3A20_group	-
22_37711988	22	37711988	C	T	0.00980392	0.846353	0.136805	2.45852e-09	g__Lachnospiraceae_NK3A20_group	PSMD6
22_37985373	22	37985373	C	T	0.00980392	0.846353	0.136805	2.45852e-09	g__Lachnospiraceae_NK3A20_group	ATXN7
22_38067897	22	38067897	C	T	0.00784314	0.985987	0.152565	5.25082e-10	g__Lachnospiraceae_NK3A20_group	ATXN7
22_48319857	22	48319857	C	T	0.0235294	3.33547	0.515611	5.06759e-10	g__Succinivibrionaceae_UCG.001	ALAS1
22_48908895	22	48908895	T	G	0.0117647	4.46262	0.720346	2.34568e-09	g__Succinivibrionaceae_UCG.002	RRP9
22_39242942	22	39242942	C	T	0.027451	0.243819	0.0426062	5.54212e-10	g__Ruminococcus	CADPS
22_48319857	22	48319857	C	T	0.0235294	2.24475	0.314426	5.73056e-14	g__Succinivibrionaceae_UCG.001	ALAS1
25_34170799	25	34170799	C	T	0.178431	-0.598971	0.116691	2.72793e-09	g__Succinivibrionaceae_UCG.001	-
