# Supplementary material
Source: Research Square preprint supplement (doi:10.21203/rs.3.rs-9101224/v1)
Supplement: Supplementary file 3 [file ac78cf28dfcb249d99660ea4.docx]

**
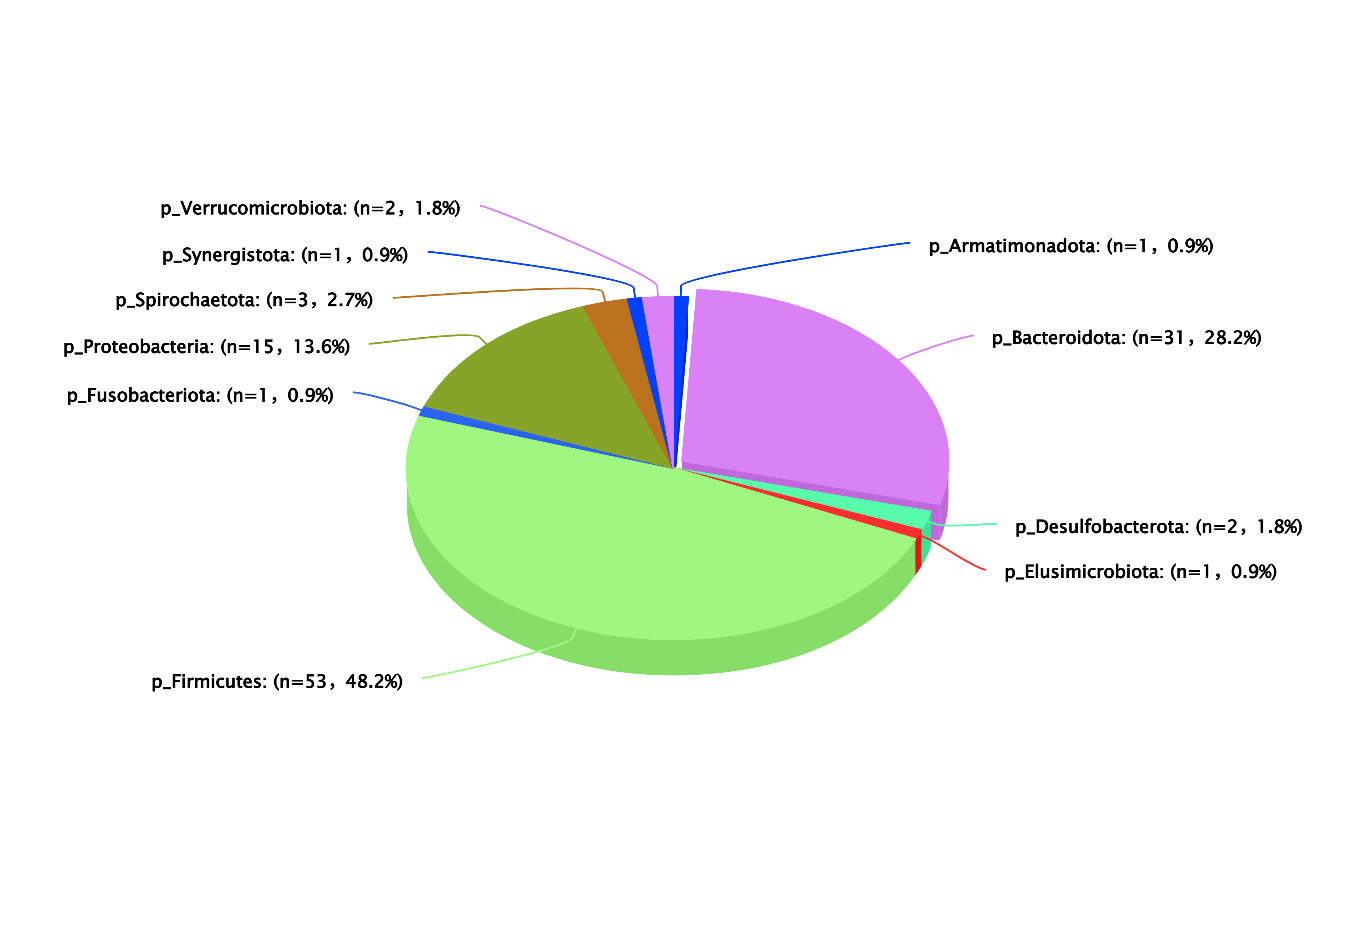
Heritable distribution of rumen microbial genera**

Fig. S4 Heritable rumen microbial genera distribution. Microorganisms were classified at the phylum level according to their taxonomic hierarchy.
