# Supplementary material
Source: Research Square preprint supplement (doi:10.21203/rs.3.rs-9101224/v1)
Supplement: Supplementary file 5 [file a79bde1d2df5b9e959e9653e.xlsx]

## Sheet: Genome-wide association of dair
NO.	SNP	CHROM	POS	REF	ALT	Effect	SE	P	SYMBOL	Gene description
1	65387679	1	65387679	A	G	-2.00931	0.343822	1.018E-07	IGSF11	immunoglobulin superfamily member 11 [Source:VGNC Symbol;Acc:VGNC:53583]
17	91876402	6	91876402	C	A	5.8702	0.679982	1.102E-07	SEPTIN11	septin 11 [Source:VGNC Symbol;Acc:VGNC:34451]
53	61588157	24	61588157	G	A	-6.5245	0.724519	1.109E-07	BCL2	apoptosis regulator [Source:VGNC Symbol;Acc:VGNC:26445]
21	13163584	10	13163584	T	C	7.6822	0.349823	1.151E-08	MEGF11	multiple EGF like domains 11 [Source:VGNC Symbol;Acc:VGNC:55123]
19	112087408	8	112087408	G	A	3.0944	0.209356	1.178E-07	MYT1L	myelin transcription factor 1 like [Source:VGNC Symbol;Acc:VGNC:59198]
15	96270397	4	96270397	G	A	6.0921	0.692956	1.181E-07	PLXNA4	plexin A4 [Source:VGNC Symbol;Acc:VGNC:33060]
16	100891537	5	100891537	G	C	-4.0922	0.489248	1.201E-07	A2M	alpha-2-macroglobulin [Source:VGNC Symbol;Acc:VGNC:55837]
51	25351308	22	25351308	G	A	-4.0921	0.631985	1.516E-07
12	120820463	3	120820463	A	G	-8.0245	0.552578	1.525E-08	NEU4	neuraminidase 4 [Source:VGNC Symbol;Acc:VGNC:50074]
11	120848837	3	120848837	G	A	1.0922	0.626414	1.645E-08	GAL3ST2	galactose-3-O-sulfotransferase 2 [Source:VGNC Symbol;Acc:VGNC:29214]
3	70809817	1	70809817	G	A	1.93437	0.540231	1.808E-07	UPK1B	Rho GTPase activating protein 31 [Source:VGNC Symbol;Acc:VGNC:26089]
32	13239352	10	13239352	T	C	3.9811	0.429476	1.878E-07	SCARNA14	small Cajal body-specific RNA 14 [Source:HGNC Symbol;Acc:HGNC:32571]
50	29883008	22	29883008	T	C	6.3319	0.532689	1.899E-07	PROK2	prokineticin 2 [Source:VGNC Symbol;Acc:VGNC:33362]
10	120757738	3	120757738	C	T	2.9145	0.283357	1.988E-08	ING5	inhibitor of growth family member 5 [Source:VGNC Symbol;Acc:VGNC:30198]
56	39227371	28	39227371	T	C	4.9382	0.582943	2.039E-07	RGR	retinal G protein coupled receptor [Source:VGNC Symbol;Acc:VGNC:33909]
31	13256689	10	13252303	G	A	-4.0918	0.433972	2.247E-07	TIPIN	TIMELESS interacting protein [Source:VGNC Symbol;Acc:VGNC:35877]
2	66655601	1	66655601	T	C	-0.92352	0.105177	2.298E-07	TEX55	testis expressed 55 [Source:VGNC Symbol;Acc:VGNC:106431]
13	120828230	3	120828230	G	A	-7.0245	0.500578	2.341E-07	PDCD1	programmed cell death 1 [Source:VGNC Symbol;Acc:VGNC:32657]
52	29961920	22	29961920	T	C	4.9365	0.18733	2.409E-07	EIF4E3	eukaryotic translation initiation factor 4E family member 3 [Source:VGNC Symbol;Acc:VGNC:28411]
54	61588116	24	61588116	A	G	-5.0333	0.481489	2.443E-07	BCL2	apoptosis regulator [Source:VGNC Symbol;Acc:VGNC:26445]
30	13252679	10	13252303	A	G	-4.8902	0.298165	2.616E-07	TIPIN	TIMELESS interacting protein [Source:VGNC Symbol;Acc:VGNC:35877]
9	120737165	3	120737165	T	G	-1.0429	0.453764	2.908E-07	ING5	inhibitor of growth family member 5 [Source:VGNC Symbol;Acc:VGNC:30198]
29	13252303	10	13252303	T	C	-8.0188	0.397134	2.985E-07	TIPIN	TIMELESS interacting protein [Source:VGNC Symbol;Acc:VGNC:35877]
34	85173389	12	85173389	T	C	-3.0944	0.338911	3.019E-07	RAB20	RAB20, member RAS onco family [Source:VGNC Symbol;Acc:VGNC:33627]
14	93577617	4	93577617	G	A	5.0144	0.395816	3.192E-07	NRF1	nuclear respiratory factor 1 [Source:VGNC Symbol;Acc:VGNC:32260]
37	10418992	13	10418992	C	T	4.2011	0.503381	3.301E-07	KIF16B	kinesin family member 16B [Source:VGNC Symbol;Acc:VGNC:30585]
8	120725970	3	120725970	C	A	-1.1194	0.481492	3.308E-07	DTYMK	deoxythymidylate kinase [Source:VGNC Symbol;Acc:VGNC:28240]
45	21205310	17	21205310	A	G	4.2967	0.620918	3.319E-07	-	-
33	85154242	12	85154242	A	C	4.9023	0.298838	3.351E-07	COL4A2	collagen type IV alpha 2 chain [Source:VGNC Symbol;Acc:VGNC:50082]
28	13234117	10	13234117	A	G	4.8133	0.470971	3.354E-07	DIS3L	DIS3 like exosome 3'-5' exoribonuclease [Source:VGNC Symbol;Acc:VGNC:28073]
27	13236601	10	13234117	A	G	4.9812	0.390815	3.723E-07	DIS3L	DIS3 like exosome 3'-5' exoribonuclease [Source:VGNC Symbol;Acc:VGNC:28073]
7	120722289	3	120722289	T	C	-5.4218	0.509224	3.888E-08	ATG4B	autophagy related 4B cysteine peptidase [Source:VGNC Symbol;Acc:VGNC:26258]
18	57475501	7	57475501	C	G	7.9071	0.334911	3.914E-07	RBM27	RNA binding motif protein 27 [Source:NCBI gene (formerly Entrezgene);Acc:516521]
26	13047710	10	13047710	A	G	-7.8845	0.501119	4.092E-07	bta-mir-11971	bta-mir-11971 [Source:miRBase;Acc:MI0038159]
44	20302085	17	20302085	G	A	7.0977	0.53022	4.317E-07	PCDH18	protocadherin 18 [Source:VGNC Symbol;Acc:VGNC:32619]
55	39213131	28	39213131	T	C	-3.9827	0.398428	4.439E-07	LRIT1	leucine rich repeat, Ig-like and transmembrane domains 1 [Source:VGNC Symbol;Acc:VGNC:30985]
25	12821670	10	12821670	G	A	-8.0233	0.490248	4.461E-07	U6	U6 spliceosomal RNA [Source:RFAM;Acc:RF00026]
47	29876406	17	29876406	T	C	-3.0955	0.391158	4.509E-07	HSPA4L	heat shock protein family A (Hsp70) member 4 like [Source:VGNC Symbol;Acc:VGNC:53906]
4	75768896	1	75768896	T	G	4.95223	0.490922	4.808E-07	ARHGAP31	CD80 molecule [Source:VGNC Symbol;Acc:VGNC:27048]
46	28702561	17	28702561	A	G	4.7812	0.29557	4.914E-07	C17H4orf33	chromosome 17 C4orf33 homolog [Source:VGNC Symbol;Acc:VGNC:52648]
42	3990180	17	3990180	G	A	4.0933	0.389167	4.966E-08	TLR2	toll like receptor 2 [Source:VGNC Symbol;Acc:VGNC:49982]
35	86183236	12	86183236	T	C	4.1452	0.109982	5.015E-07	SPACA7	sperm acrosome associated 7 [Source:VGNC Symbol;Acc:VGNC:107255]
48	29908490	17	29908490	T	C	4.4561	0.459126	6.104E-07	SLC25A31	solute carrier family 25 member 31 [Source:VGNC Symbol;Acc:VGNC:34757]
23	13164794	10	13164794	T	C	2.4181	0.710934	6.619E-07	MEGF11	multiple EGF like domains 11 [Source:VGNC Symbol;Acc:VGNC:55123]
36	86222088	12	86222088	T	G	3.1482	0.409133	6.628E-07	TUBGCP3	tubulin gamma complex component 3 [Source:VGNC Symbol;Acc:VGNC:36513]
24	13160589	10	13160589	T	C	7.2098	0.582201	7.325E-07	MEGF11	multiple EGF like domains 11 [Source:VGNC Symbol;Acc:VGNC:55123]
49	30003107	17	30003107	T	G	-7.0255	0.428739	7.699E-07	INTU	inturned planar cell polarity protein [Source:VGNC Symbol;Acc:VGNC:30235]
22	13163118	10	13163118	C	G	3.4509	0.592714	7.829E-07	MEGF11	multiple EGF like domains 11 [Source:VGNC Symbol;Acc:VGNC:55123]
41	71872152	16	71872152	T	G	2.5867	0.390278	7.929E-07	-	-
5	37942844	2	37942844	G	T	-0.58231	0.200091	8.108E-07	LIN28A	lin-28 homolog A [Source:NCBI gene (formerly Entrezgene);Acc:614997]
39	71868932	16	71868932	T	C	3.0967	0.390183	8.155E-07	NEK2	NIMA related kinase 2 [Source:VGNC Symbol;Acc:VGNC:31993]
40	71867014	16	71867014	T	C	3.6104	0.402381	8.273E-07	-	-
38	71786256	16	71786256	A	C	4.4298	0.289144	8.322E-07	NEK2	NIMA related kinase 2 [Source:VGNC Symbol;Acc:VGNC:31993]
6	120720970	3	120720970	C	T	-3.0345	0.104472	8.948E-08	ATG4B	autophagy related 4B cysteine peptidase [Source:VGNC Symbol;Acc:VGNC:26258]
20	11762895	10	11762895	C	T	-6.0455	0.529722	8.966E-08	RAB11A	member RAS onco family [Source:VGNC Symbol;Acc:VGNC:33614]
43	3993933	17	3993933	G	A	2.9828	0.402895	9.208E-08	TLR2	toll like receptor 2 [Source:VGNC Symbol;Acc:VGNC:49982]
