# Supplementary material
Source: Research Square preprint supplement (doi:10.21203/rs.3.rs-9101224/v1)
Supplement: Supplementary file 6 [file a8d3c3d20088ed8631158672.xlsx]

## Sheet: MWAS_Pval
genus	phylum	Estimate	Std. Error	pval
g__Erysipelotrichaceae_UCG-002	p__Firmicutes	-213.681	9.13107	9.0693e-05
g__unclassified_f__ML635J-40_aquatic_group	p__Bacteroidota	-163.92	10.1051	0.0010604
g__unclassified_o__RF39	p__Firmicutes	-143.703	1.53051	0.00193328
g__unclassified_f__PeH15	p__Bacteroidota	-129.617	9.64019	0.0018
g__Lachnobacterium	p__Firmicutes	-121.922	9.47893	0.00199557
g__[Anaerorhabdus]_furcosa_group	p__Firmicutes	-111.749	10.1686	0.00272851
g__Streptococcus	p__Firmicutes	-108.05	10.5086	0.00304854
g__Lactobacillus	p__Synergistota	-107.253	9.88529	0.00278986
g__[Eubacterium]_nodatum_group	p__Firmicutes	-105.805	0.246353	0.00178742
g__Selenomonas	p__Firmicutes	-99.1174	8.7281	0.00257215
g__Christensenellaceae_R-7_group	p__Firmicutes	-90.3043	10.3838	0.000385323
g__Murdochiella	p__Firmicutes	-88.3633	10.8361	0.00415598
g__Succinivibrio	p__Firmicutes	-79.3262	8.95042	0.00376323
g__Porphyromonas	p__Bacteroidota	-78.0861	10.735	0.00467668
g__Prevotellaceae_UCG-004	p__Bacteroidota	-77.5513	9.1364	0.00396802
g__unclassified_f__Muribaculaceae	p__Bacteroidota	-76.4863	9.67928	0.00430162
g__[Eubacterium]_eligens_group	p__Elusimicrobiota	-75.4832	9.42362	0.00423898
g__Kandleria	p__Firmicutes	-75.4234	0.886814	0.00946584
g__Prevotella_7	p__Firmicutes	-72.2558	8.69574	0.00406811
g__Limosilactobacillus	p__Firmicutes	-72.0257	10.9793	0.00512424
g__unclassified_f__Marinifilaceae	p__Bacteroidota	-71.7063	10.3329	0.00488358
g__probable_genus_10	p__Firmicutes	-69.8766	8.69327	0.00422282
g__Anaerovibrio	p__Firmicutes	-66.9048	8.53056	0.00433615
g__Asteroleplasma	p__Proteobacteria	-66.7232	10.9781	0.00543886
g__unclassified_f__Lachnospiraceae	p__Firmicutes	-64.5667	5.81538	0.00443665
g__unclassified_o__Veillonellales-Selenomonadales	p__Firmicutes	-61.1454	9.9966	0.00541321
g__Syntrophococcus	p__Firmicutes	-55.544	8.43682	0.00510923
g__Pseudobutyrivibrio	p__Firmicutes	-54.7826	8.6317	0.00526231
g__DNF00809	p__Firmicutes	-54.0114	9.88831	0.0058541
g__Lachnoclostridium	p__Firmicutes	-54.0013	7.93124	0.0049659
g__Megasphaera	p__Firmicutes	-48.3832	9.67007	0.00617279
g__Anaerostipes	p__Firmicutes	-43.3701	10.9788	0.00693156
g__Desulfobulbus	p__Firmicutes	-40.948	9.36359	0.00662266
g__Pyramidobacter	p__Firmicutes	-40.847	9.82934	0.0067809
g__[Eubacterium]_ruminantium_group	p__Firmicutes	-39.5132	8.84594	0.00655495
g__Anaerosinus	p__Firmicutes	-38.906	11.061	0.00725332
g__Roseburia	p__Proteobacteria	-30.6465	9.47606	0.00746657
g__Anaeroplasma	p__Firmicutes	-29.2253	8.07439	0.00717697
g__Papillibacter	p__Firmicutes	-27.8283	9.6275	0.00772785
g__Prevotellaceae_NK3B31_group	p__Actinobacteriota	-25.226	14.0351	0.00857507
g__Desulfitobacterium	p__Firmicutes	-24.3273	10.0744	0.00809385
g__Sphaerochaeta	p__Firmicutes	-19.391	9.90061	0.00844883
g__Erysipelotrichaceae_UCG-007	p__Firmicutes	-15.8109	9.48218	0.00867708
g__Hydrogenispora	p__Firmicutes	-14.6045	10.4249	0.00888701
g__Mitsuokella	p__Firmicutes	-13.6193	12.4583	0.00913038
g__Prevotella	p__Bacteroidota	0.656877	10.3022	0.00994918
g__Erysipelotrichaceae_UCG-009	p__Firmicutes	0.781731	9.33236	0.00993323
g__[Eubacterium]_hallii_group	p__Firmicutes	3.14812	0.0402519	0.00968652
g__Mycoplasma	p__Spirochaetota	4.37571	9.56851	0.00963562
g__Lachnospiraceae_UCG-008	p__Actinobacteriota	4.901	10.3961	0.00962437
g__Saccharofermentans	p__Firmicutes	5.45085	0.0815026	0.00944918
g__Family_XIII_UCG-001	p__Bacteroidota	5.53133	8.46913	0.00947978
g__unclassified_f__Bacteroidales_UCG-001	p__Firmicutes	12.0286	9.11556	0.00895126
g__Marvinbryantia	p__Firmicutes	14.7497	8.70169	0.00865538
g__unclassified_c__Clostridia	p__Firmicutes	16.3633	12.4955	0.00895918
g__unclassified_f__Oscillospiraceae	p__Firmicutes	16.4641	0.0704531	0.0023643
g__Sporomusa	p__Firmicutes	19.3475	11.8196	0.00870108
g__unclassified_f__Bacteroidales_RF16_group	p__Bacteroidota	20.8063	0.130579	0.00835845
g__unclassified_f__Erysipelotrichaceae	p__Firmicutes	22.2493	11.7851	0.0085041
g__Lachnospiraceae_NK4A136_group	p__Firmicutes	27.9485	8.45056	0.00741128
g__Lachnospiraceae_FE2018_group	p__Firmicutes	31.5785	8.82072	0.00720645
g__Monoglobus	p__Bacteroidota	32.0369	9.88666	0.0074618
g__unclassified_f__F082	p__Bacteroidota	33.6633	12.0874	0.00780862
g__Lachnospiraceae_NK3A20_group	p__Firmicutes	33.8625	8.24283	0.000681566
g__Sharpea	p__Bacteroidota	43.6075	8.9066	0.00624843
g__Elusimicrobium	p__Firmicutes	44.9689	9.84505	0.00648238
g__Coprococcus	p__Firmicutes	45.0148	1.41029	0.00592967
g__Acetobacter	p__Firmicutes	49.6967	8.76778	0.00571356
g__Prevotellaceae_UCG-001	p__Bacteroidota	49.996	2.41381	0.00552911
g__unclassified_o__Chloroplast	p__Cyanobacteria	53.024	8.12819	0.00514782
g__Lachnospiraceae_ND3007_group	p__Firmicutes	56.413	8.2965	0.00497163
g__Erysipelotrichaceae_UCG-008	p__Firmicutes	56.6888	9.28491	0.00542058
g__[Eubacterium]_xylanophilum_group	p__Firmicutes	61.5696	9.60522	0.00522114
g__UCG-004	p__Firmicutes	62.1701	9.47758	0.00453325
g__Lachnospiraceae_AC2044_group	p__Firmicutes	62.8354	9.28148	0.00499038
g__Lachnospiraceae_XPB1014_group	p__Firmicutes	65.3371	10.959	0.00551587
g__unclassified_f__Selenomonadaceae	p__Firmicutes	67.8035	12.0949	0.00575581
g__CAG-873	p__Bacteroidota	69.3645	11.5697	0.00549364
g__[Eubacterium]_cellulosolvens_group	p__Firmicutes	74.0229	8.55871	0.00387938
g__Erysipelotrichaceae_UGC-003	p__Firmicutes	75.9058	0.966077	0.0041347
g__Schwartzia	p__Firmicutes	77.4974	1.19133	0.00508035
g__Prevotellaceae_Ga6A1_group	p__Firmicutes	81.4159	10.4772	0.00437853
g__Ligilactobacillus	p__Firmicutes	81.5587	11.7857	0.00489575
g__Alloprevotella	p__Bacteroidota	89.3843	9.59592	0.0035251
g__Atopobium	p__Firmicutes	91.0068	8.33275	0.00275823
g__Erysipelotrichaceae_UGC-005	p__Firmicutes	91.4757	1.03447	0.00255994
g__Pseudoscardovia	p__Desulfobacterota	94.7056	9.13129	0.00300674
g__Lachnospiraceae_FCS020_group	p__Firmicutes	96.058	10.1724	0.00345934
g__Solobacterium	p__Desulfobacterota	96.3704	9.22802	0.00297353
g__Alloprevotella	p__Firmicutes	98.6385	8.75506	0.00260981
g__unclassified_f__Anaerovoracaceae	p__Firmicutes	102.167	2.21257	0.0021466
g__Lachnospira	p__Firmicutes	102.222	1.1185	0.00192273
g__Shuttleworthia	p__Firmicutes	102.464	10.8743	0.00346979
g__Allisonella	p__Firmicutes	115.208	13.5576	0.00396277
g__Rikenellaceae_RC9_gut_group	p__Bacteroidota	119.351	2.58483	0.0021423
g__Blautia	p__Bacteroidota	127.478	9.29492	0.00171465
g__Moryella	p__Firmicutes	129.16	9.35477	0.00168618
g__Ruminiclostridium	p__Firmicutes	132.878	10.9909	0.00227821
g__Prevotella	p__Bacteroidota	136.461	9.05472	0.00855895
g__Prevotellaceae_YAB2003_group	p__Bacteroidota	137.815	22.3434	0.00149976
g__Dialister	p__Fibrobacterota	138.357	9.52927	0.0014779
g__Oribacterium	p__Firmicutes	138.743	12	0.00248713
g__Treponema	p__Spirochaetota	140.704	18.4021	0.00179922
g__Succinivibrionaceae_UCG-001	p__Proteobacteria	341.548	8.71771	0.000757137
g__Lachnospiraceae_UCG-006	p__Actinobacteriota	141.749	9.74379	0.00147
g__[Eubacterium]_ventriosum_group	p__Firmicutes	143.832	12.2247	0.00240494
g__unclassified_o__Absconditabacteriales_SR1	p__Patescibacteria	144.559	32.693	0.00387335
g__Christensenellaceae_R-7_group	p__Firmicutes	545.477	1.3792	6.33e-06
g__Fecalibacterium	p__Firmicutes	150.409	1.14379	0.0016268
g__unclassified_f__Marinilabiliaceae	p__Bacteroidota	153.113	9.65662	0.00114111
g__unclassified_c__Bacteroidia	p__Firmicutes	154.025	10.7355	0.00152625
g__Succiniclasticum	p__Firmicutes	154.078	7.86792	0.000513148
g__UCG-002	p__Firmicutes	155.086	11.0332	0.00154677
g__U29-B03	p__Bacteroidota	160.947	10.1687	0.00114747
g__Helcococcus	p__Firmicutes	163.641	10.9781	0.00137332
g__Bifidobacterium	p__Firmicutes	172.006	9.22557	0.0016344
g__Amnipila	p__Firmicutes	173.303	9.59175	0.000720066
g__UCG-001	p__Firmicutes	175.612	1.76462	0.0005124
g__Lachnospiraceae_UCG-002	p__Firmicutes	181.107	10.3526	0.00481461
g__Lachnospiraceae_NK3A20_group	p__Firmicutes	181.536	10.5613	8.842e-06
g__Prevotella_7	p__Bacteroidota	192.597	10.8038	0.000758605
g__NK4A214_group	p__Firmicutes	193.912	8.64685	0.000258085
g__Defluviitaleaceae_UCG-011	p__Bacteroidota	206.125	10.1346	0.0044303
g__Fibrobacter	p__Firmicutes	213.255	10.9163	0.00251879
g__Colidextribacter	p__Firmicutes	213.356	11.4386	0.0006333
g__Butyrivibrio	p__Firmicutes	242.637	7.88679	0.00589263
g__Veillonella	p__Firmicutes	270.162	10.865	0.00413558
g__Succinivibrionaceae_UCG-001	p__Proteobacteria	271.53	17.6338	0.000124878
g__Acetitomaculum	p__Firmicutes	288.962	7.80679	0.00255574
g__Ruminococcus_gauvreauii_group	p__Firmicutes	314.998	9.32595	0.00872363
g__unclassified_f__Acidaminococcaceae	p__Firmicutes	334.571	11.8987	0.00253198
g__unclassified_o__Desulfitobacteriales	p__Firmicutes	347.471	11.0461	0.00118596
g__Ruminococcus	p__Firmicutes	359.557	8.1895	0.00467765
g__Family_XIII_AD3011_group	p__Firmicutes	396.173	9.27848	0.00300972
g__Paraprevotella	p__Bacteroidota	401.237	20.2367	0.00748502
g__Clostridia_UCG-014	p__Firmicutes	468.879	8.56084	0.00421832
