# Supplementary material
Source: Research Square preprint supplement (doi:10.21203/rs.3.rs-9101224/v1)
Supplement: Supplementary file 7 [file aa6e91fb46b6ed5d3396897d.xlsx]

## Sheet: 1
genus	Prevalence	Percent	phylum	class	order	family	species
g__Lachnospiraceae_NK3A20_group	1	0.00187849	p__Firmicutes	c__Clostridia	o__Lachnospirales	f__Lachnospiraceae	s__uncultured_rumen_bacterium_g__Lachnospiraceae_NK3A20_group
g__Shuttleworthia	1	0.00117154	p__Firmicutes	c__Clostridia	o__Lachnospirales	f__Lachnospiraceae	s__uncultured_bacterium_g__Shuttleworthia
g__Prevotella	1	0.00160736	p__Bacteroidota	c__Bacteroidia	o__Bacteroidales	f__Prevotellaceae	s__uncultured_rumen_bacterium_g__Prevotella
g__Butyrivibrio	1	0.00122017	p__Firmicutes	c__Clostridia	o__Lachnospirales	f__Lachnospiraceae	s__Butyrivibrio_fibrisolvens_g__Butyrivibrio
g__Succiniclasticum	1	0.0327985	p__Firmicutes	c__Negativicutes	o__Acidaminococcales	f__Acidaminococcaceae	s__uncultured_rumen_bacterium_g__Succiniclasticum
g__NK4A214_group	1	0.0156902	p__Firmicutes	c__Clostridia	o__Oscillospirales	f__Oscillospiraceae	s__uncultured_rumen_bacterium_g__NK4A214_group
g__Ruminococcus_gauvreauii_group	1	0.00483315	p__Firmicutes	c__Clostridia	o__Eubacteriales	f__Ruminococcaceae	s__uncultured_rumen_bacterium_g__Ruminococcus_gauvreauii_group
g__Ruminococcus	1	0.000901622	p__Firmicutes	c__Clostridia	o__Oscillospirales	f__Ruminococcaceae	s__uncultured_rumen_bacterium_g__Ruminococcus
g__Clostridia_UCG-014	1	0.000855825	p__Firmicutes	c__Clostridia	o__Eubacteriales	f__Ruminococcaceae	s__uncultured_rumen_bacterium_g__Clostridia_UCG-014
g__Acetitomaculum	1	0.00165126	p__Firmicutes	c__Clostridia	o__Lachnospirales	f__Lachnospiraceae	s__uncultured_rumen_g__Acetitomaculum
g__Christensenellaceae_R-7_group	1	0.00320296	p__Firmicutes	c__Clostridia	o__Christensenellales	f__Christensenellaceae	s__uncultured_rumen_bacterium_g__Christensenellaceae_R-7_group
g__Rikenellaceae_RC9_gut_group	1	0.00277241	p__Bacteroidota	c__Bacteroidia	o__Bacteroidales	f__Rikenellaceae	s__uncultured_rumen_bacterium_g__Rikenellaceae_RC9_gut_group
g__Erysipelotrichaceae_UGC-005	1	0.00198603	p__Firmicutes	c__Erysipelotrichia	o__Erysipelotrichales	f__Erysipelotrichaceae,	s__uncultured_rumen_bacteriumg__Erysipelotrichaceae_UGC-005
g__Erysipelotrichaceae_UGC-003	1	0.00123503	p__Firmicutes	c__Erysipelotrichia	o__Erysipelotrichales	f__Erysipelotrichaceae,	s__uncultured_rumen_bacteriumg__Erysipelotrichaceae_UGC-003
g__Kandleria	1	0.00147834	p__Firmicutes	c__Bacilli	o__Lactobacillales	f__Carnobacteriaceae	s__uncultured_rumen_bacterium_g__Kandleria
g__Fecalibacterium	1	0.00129326	p__Firmicutes	c__Clostridia	o__Saccharimonadales	f__Saccharimonadaceae	s__uncultured_rumen_bacterium_g__Candidatus_Saccharimonas
g__Prevotellaceae_UCG-001	1	0.00115141	p__Bacteroidota	c__Bacteroidia	o__Bacteroidales	f__Prevotellaceae	s__uncultured_rumen_bacterium_g__Prevotellaceae_UCG-001
g__[Eubacterium]_nodatum_group	1	0.00045608	p__Firmicutes	c__Clostridia	o__Peptostreptococcales-Tissierellales	f__Eubacteriales	s__Eubacterium_sp._AB3007
g__Family_XIII_AD3011_group	1	0.00121288	p__Firmicutes	c__Clostridia	o__Peptostreptococcales-Tissierellales	f__Anaerovoracaceae	s__uncultured_bacterium_g__Family_XIII_AD3011_group
g__Pseudobutyrivibrio	1	0.00383453	p__Firmicutes	c__Clostridia	o__Lachnospirales	f__Lachnospiraceae	s__uncultured_rumen_bacterium_g__Pseudobutyrivibrio
g__unclassified_o__RF39	0.996454	0.0012353	p__Firmicutes	c__Bacilli	o__RF39	f__unclassified_o__RF39	s__human_gut_metagenome_g__unclassified_o__RF39
g__unclassified_f__Lachnospiraceae	0.996454	0.000402312	p__Firmicutes	c__Clostridia	o__Lachnospirales	f__Lachnospiraceae	s__uncultured_Pseudobutyrivibrio_sp._g__unclassified_f__Lachnospiraceae
g__UCG-001	0.996454	0.00301653	p__Firmicutes	c__Clostridia	o__Oscillospirales	f__Ruminococcaceae	s__uncultured_bacterium_g__UCG-001
g__Schwartzia	0.996454	0.00292156	p__Firmicutes	c__Negativicutes	o__Veillonellales-Selenomonadales	f__Selenomonadaceae	s__uncultured_rumen_bacterium_g__Schwartzia
g__unclassified_f__Anaerovoracaceae	0.996454	0.000913105	p__Firmicutes	c__Clostridia	o__Peptostreptococcales-Tissierellales	f__Anaerovoracaceae	s__unclassified_f__Anaerovoracaceae
g__unclassified_f__Oscillospiraceae	0.996454	0.000756665	p__Firmicutes	c__Clostridia	o__Oscillospirales	f__Oscillospiraceae	s__uncultured_rumen_bacterium_g__unclassified_f__Oscillospiraceae
g__unclassified_f__Bacteroidales_RF16_group	0.996454	0.00274837	p__Bacteroidota	c__Bacteroidia	o__Bacteroidales	f__Bacteroidales_RF16_group	s__uncultured_rumen_bacterium_g__unclassified_f__Bacteroidales_RF16_group
g__[Eubacterium]_hallii_group	0.996454	0.00125381	p__Firmicutes	c__Clostridia	o__Lachnospirales	f__Lachnospiraceae	s__uncultured_rumen_bacterium_g__[Eubacterium]_hallii_group
g__Saccharofermentans	0.996454	0.00155345	p__Firmicutes	c__Clostridia	o__Oscillospirales	f__Hungateiclostridiaceae	s__uncultured_rumen_bacterium_g__Saccharofermentans
g__Treponema	0.996454	0.000752612	p__Spirochaetota	c__Spirochaetia	o__Spirochaetales	f__Spirochaetaceae	s__Treponema_bryantii
g__Prevotellaceae_YAB2003_group	0.996454	0.00183445	p__Bacteroidota	c__Bacteroidia	o__Bacteroidales	f__Prevotellaceae	s__uncultured_rumen_bacterium_g__Prevotellaceae_YAB2003_group
g__UCG-004	0.992908	0.00128705	p__Firmicutes	c__Bacilli	o__Erysipelotrichales	f__Erysipelatoclostridiaceae	s__uncultured_rumen_bacterium_g__UCG-004
g__unclassified_o__Absconditabacteriales_SR1	0.992908	0.00264583	p__Patescibacteria	c__Gracilibacteria	o__Absconditabacteriales_SR1	f__unclassified_o__Absconditabacteriales_SR1	s__uncultured_rumen_bacterium_g__unclassified_o__Absconditabacteriales_SR1
g__Coprococcus	0.992908	0.000393261	p__Firmicutes	c__Clostridia	o__Lachnospirales	f__Lachnospiraceae	s__unclassified_g__Coprococcus
g__UCG-002	0.992908	0.00135608	p__Firmicutes	c__Clostridia	o__Oscillospirales	f__Oscillospiraceae	s__uncultured_bacterium_g__UCG-002
g__Lachnospira	0.992908	0.0013885	p__Firmicutes	c__Clostridia	o__Lachnospirales	f__Lachnospiraceae	s__Lachnospira_multipara
g__Lachnospiraceae_NK4A136_group	0.992908	0.00127232	p__Firmicutes	c__Clostridia	o__Lachnospirales	f__Lachnospiraceae	s__uncultured_rumen_bacterium_g__Lachnospiraceae_NK4A136_group
g__Moryella	0.992908	0.000748695	p__Firmicutes	c__Clostridia	o__Lachnospirales	f__Lachnospiraceae	s__uncultured_rumen_bacterium_g__Moryella
g__unclassified_o__Chloroplast	0.989362	0.000909592	p__Cyanobacteria	c__Cyanobacteriia	o__Chloroplast	f__unclassified_o__Chloroplast	s__unclassified_o__Chloroplast
g__Prevotellaceae_UCG-004	0.989362	0.000567262	p__Bacteroidota	c__Bacteroidia	o__Bacteroidales	f__Prevotellaceae	s__uncultured_rumen_bacterium_g__Prevotellaceae_UCG-004
g__Lachnospiraceae_FE2018_group	0.989362	0.000411904	p__Firmicutes	c__Clostridia	o__Lachnospirales	f__Lachnospiraceae	s__bacterium_FE2018
g__U29-B03	0.989362	0.000758556	p__Bacteroidota	c__Bacteroidia	o__Bacteroidales	f__Rikenellaceae	s__uncultured_bacterium_g__U29-B03
g__Lachnoclostridium	0.989362	0.000948635	p__Firmicutes	c__Clostridia	o__Lachnospirales	f__Lachnospiraceae	s__uncultured_rumen_bacterium_g__Lachnoclostridium
g__unclassified_f__Erysipelotrichaceae	0.989362	0.000621976	p__Firmicutes	c__Bacilli	o__Erysipelotrichales	f__Erysipelotrichaceae	s__uncultured_rumen_bacterium_g__unclassified_f__Erysipelotrichaceae
g__Shuttleworthia	0.989362	0.0046582	p__Firmicutes	c__Clostridia	o__Lachnospirales	f__Lachnospiraceae	s__unclassified_g__Shuttleworthia
g__Marvinbryantia	0.989362	0.000941339	p__Firmicutes	c__Clostridia	o__Lachnospirales	f__Lachnospiraceae	s__uncultured_rumen_bacterium_g__Marvinbryantia
g__Lachnospiraceae_AC2044_group	0.985816	0.000817728	p__Firmicutes	c__Clostridia	o__Lachnospirales	f__Lachnospiraceae	s__uncultured_rumen_bacterium_g__Lachnospiraceae_AC2044_group
g__Anaeroplasma	0.985816	0.000651021	p__Firmicutes	c__Bacilli	o__Acholeplasmatales	f__Acholeplasmataceae	s__uncultured_rumen_bacterium_g__Anaeroplasma
g__Alloprevotella	0.98227	0.000383534	p__Bacteroidota	c__Bacteroidia	o__Bacteroidales	f__Prevotellaceae	s__uncultured_rumen_bacterium_g__Alloprevotella
g__Defluviitaleaceae_UCG-011	0.98227	0.000387992	p__Firmicutes	c__Clostridia	o__Lachnospirales	f__Defluviitaleaceae	s__uncultured_rumen_bacterium_g__Defluviitaleaceae_UCG-011
g__Erysipelotrichaceae_UCG-009	0.98227	0.00129988	p__Firmicutes	c__Bacilli	o__Erysipelotrichales	f__Erysipelotrichaceae	s__uncultured_rumen_bacterium_g__Erysipelotrichaceae_UCG-009
g__Syntrophococcus	0.978723	0.000343411	p__Firmicutes	c__Clostridia	o__Lachnospirales	f__Lachnospiraceae	s__Syntrophococcus_sucromutans
g__Lachnospiraceae_XPB1014_group	0.978723	0.000474452	p__Firmicutes	c__Clostridia	o__Lachnospirales	f__Lachnospiraceae	s__unclassified_g__Lachnospiraceae_XPB1014_group
g__Prevotella_7	0.975177	0.0235	p__Bacteroidota	c__Bacteroidia	o__Bacteroidales	f__Prevotellaceae	s__uncultured_rumen_bacterium_g__Prevotella_7
g__Blautia	0.975177	0.000310042	p__Firmicutes	c__Clostridia	o__Lachnospirales	f__Lachnospiraceae	s__unclassified_g__Blautia
g__Prevotellaceae_Ga6A1_group	0.975177	0.00146591	p__Bacteroidota	c__Bacteroidia	o__Bacteroidales	f__Prevotellaceae	s__uncultured_rumen_bacterium_g__Prevotellaceae_Ga6A1_group
g__Sharpea	0.971631	0.00473966	p__Firmicutes	c__Bacilli	o__Erysipelotrichales	f__Erysipelatoclostridiaceae	s__uncultured_bacterium_g__Sharpea
g__probable_genus_10	0.971631	0.00105779	p__Firmicutes	c__Clostridia	o__Lachnospirales	f__Lachnospiraceae	s__uncultured_bacterium_g__probable_genus_10
g__Lachnospiraceae_UCG-002	0.971631	0.000206425	p__Firmicutes	c__Clostridia	o__Lachnospirales	f__Lachnospiraceae	s__unclassified_g__Lachnospiraceae_UCG-002
g__unclassified_f__Bacteroidales_UCG-001	0.968085	0.000388802	p__Bacteroidota	c__Bacteroidia	o__Bacteroidales	f__Bacteroidales_UCG-001	s__uncultured_rumen_bacterium_g__unclassified_f__Bacteroidales_UCG-001
g__Family_XIII_UCG-001	0.968085	0.000218583	p__Firmicutes	c__Clostridia	o__Peptostreptococcales-Tissierellales	f__Anaerovoracaceae	s__uncultured_rumen_bacterium_g__Family_XIII_UCG-001
g__[Eubacterium]_cellulosolvens_group	0.964539	0.000276674	p__Firmicutes	c__Clostridia	o__Lachnospirales	f__Lachnospiraceae	s__[Eubacterium]_cellulosolvens_6
g__Lachnobacterium	0.957447	0.000613195	p__Firmicutes	c__Clostridia	o__Lachnospirales	f__Lachnospiraceae	s__Lachnobacterium_bovis
g__Atopobium	0.953901	0.000483909	p__Actinobacteriota	c__Coriobacteriia	o__Coriobacteriales	f__Atopobiaceae	s__uncultured_rumen_bacterium_g__Atopobium
g__Prevotellaceae_NK3B31_group	0.950355	0.00048499	p__Bacteroidota	c__Bacteroidia	o__Bacteroidales	f__Prevotellaceae	s__uncultured_rumen_bacterium_g__Prevotellaceae_NK3B31_group
g__Veillonellaceae_UCG-001	0.946809	0.000878115	p__Firmicutes	c__Negativicutes	o__Veillonellales-Selenomonadales	f__Selenomonadaceae	s__uncultured_rumen_bacterium_g__Veillonellaceae_UCG-001
g__Acetobacter	0.946809	0.000495392	p__Proteobacteria	c__Alphaproteobacteria	o__Acetobacterales	f__Acetobacteraceae	s__unclassified_g__Acetobacter
g__Succinivibrionaceae_UCG-001	0.946809	0.046054	p__Proteobacteria	c__Gammaproteobacteria	o__Enterobacterales	f__Succinivibrionaceae	s__uncultured_rumen_bacterium_g__Succinivibrionaceae_UCG-001
g__Roseburia	0.943262	0.000216692	p__Firmicutes	c__Clostridia	o__Lachnospirales	f__Lachnospiraceae	s__uncultured_rumen_bacterium_g__Roseburia
g__Anaerovibrio	0.943262	0.000716947	p__Firmicutes	c__Negativicutes	o__Veillonellales-Selenomonadales	f__Selenomonadaceae	s__unclassified_g__Anaerovibrio
g__Lachnospiraceae_ND3007_group	0.939716	0.000719109	p__Firmicutes	c__Clostridia	o__Lachnospirales	f__Lachnospiraceae	s__uncultured_Lachnospiraceae_bacterium_g__Lachnospiraceae_ND3007_group
g__Selenomonas	0.93617	0.00164532	p__Firmicutes	c__Negativicutes	o__Veillonellales-Selenomonadales	f__Selenomonadaceae	s__Selenomonas_ruminantium_subsp._lactilytica_TAM6421
g__DNF00809	0.93617	0.000231282	p__Actinobacteriota	c__Coriobacteriia	o__Coriobacteriales	f__Eggerthellaceae	s__uncultured_bacterium_g__DNF00809
g__Lachnospiraceae_UCG-008	0.932624	0.000268298	p__Firmicutes	c__Clostridia	o__Lachnospirales	f__Lachnospiraceae	s__uncultured_rumen_bacterium_g__Lachnospiraceae_UCG-008
g__Oribacterium	0.925532	0.000196428	p__Firmicutes	c__Clostridia	o__Lachnospirales	f__Lachnospiraceae	s__uncultured_rumen_bacterium_g__Oribacterium
g__unclassified_c__Clostridia	0.925532	0.000192645	p__Firmicutes	c__Clostridia	o__unclassified_c__Clostridia	f__unclassified_c__Clostridia	s__unclassified_c__Clostridia
g__Streptococcus	0.921986	0.000454188	p__Firmicutes	c__Bacilli	o__Lactobacillales	f__Streptococcaceae	s__Streptococcus_lutetiensis
g__Colidextribacter	0.921986	0.00109562	p__Firmicutes	c__Clostridia	o__Oscillospirales	f__Oscillospiraceae	s__uncultured_rumen_bacterium_g__Colidextribacter
g__Amnipila	0.91844	0.000218853	p__Firmicutes	c__Clostridia	o__Peptostreptococcales-Tissierellales	f__Anaerovoracaceae	s__uncultured_bacterium_g__Amnipila
g__Succinivibrio	0.911348	0.000219529	p__Proteobacteria	c__Gammaproteobacteria	o__Enterobacterales	f__Succinivibrionaceae	s__uncultured_bacterium_g__Succinivibrio
g__Asteroleplasma	0.911348	0.000327875	p__Firmicutes	c__Bacilli	o__Erysipelotrichales	f__Erysipelatoclostridiaceae	s__Asteroleplasma_anaerobium
g__Limosilactobacillus	0.911348	0.00030626	p__Firmicutes	c__Bacilli	o__Lactobacillales	f__Lactobacillaceae	s__Lactobacillus_mucosae_LM1
g__Erysipelotrichaceae_UCG-008	0.897163	0.000136986	p__Firmicutes	c__Bacilli	o__Erysipelotrichales	f__Erysipelotrichaceae	s__uncultured_rumen_bacterium_g__Erysipelotrichaceae_UCG-008
g__[Eubacterium]_ventriosum_group	0.897163	0.000288157	p__Firmicutes	c__Clostridia	o__Lachnospirales	f__Lachnospiraceae	s__uncultured_rumen_bacterium_g__[Eubacterium]_ventriosum_group
g__Papillibacter	0.897163	0.00044973	p__Firmicutes	c__Clostridia	o__Oscillospirales	f__Oscillospiraceae	s__uncultured_rumen_bacterium_g__Papillibacter
g__Bifidobacterium	0.875887	0.00221758	p__Actinobacteriota	c__Actinobacteria	o__Bifidobacteriales	f__Bifidobacteriaceae	s__Bifidobacterium_adolescentis
g__Erysipelotrichaceae_UCG-002	0.865248	0.00472966	p__Firmicutes	c__Bacilli	o__Erysipelotrichales	f__Erysipelatoclostridiaceae	s__Erysipelotrichaceae_bacterium_SG0102
g__Lachnospiraceae_FCS020_group	0.865248	0.000234119	p__Firmicutes	c__Clostridia	o__Lachnospirales	f__Lachnospiraceae	s__uncultured_rumen_bacterium_g__Lachnospiraceae_FCS020_group
g__Desulfovibrio	0.861702	0.000131852	p__Desulfobacterota	c__Desulfovibrionia	o__Desulfovibrionales	f__Desulfovibrionaceae	s__unclassified_g__Desulfovibrio
g__Kandleria	0.847518	0.00128043	p__Firmicutes	c__Bacilli	o__Erysipelotrichales	f__Erysipelatoclostridiaceae	s__Kandleria_vitulina
g__Solobacterium	0.847518	0.000148334	p__Firmicutes	c__Bacilli	o__Erysipelotrichales	f__Erysipelotrichaceae	s__uncultured_rumen_bacterium_g__Solobacterium
g__Desulfobulbus	0.843972	0.000126989	p__Desulfobacterota	c__Desulfobulbia	o__Desulfobulbales	f__Desulfobulbaceae	s__uncultured_rumen_bacterium_g__Desulfobulbus
g__[Anaerorhabdus]_furcosa_group	0.840426	0.000131042	p__Firmicutes	c__Bacilli	o__Erysipelotrichales	f__Erysipelotrichaceae	s__uncultured_Erysipelotrichaceae_bacterium_g__[Anaerorhabdus]_furcosa_group
g__Pseudoscardovia	0.833333	0.00212099	p__Actinobacteriota	c__Actinobacteria	o__Bifidobacteriales	f__Bifidobacteriaceae	s__Pseudoscardovia_suis
g__Fibrobacter	0.829787	0.000358811	p__Fibrobacterota	c__Fibrobacteria	o__Fibrobacterales	f__Fibrobacteraceae	s__unclassified_g__Fibrobacter
g__Lachnospiraceae_UCG-006	0.812057	0.000106049	p__Firmicutes	c__Clostridia	o__Lachnospirales	f__Lachnospiraceae	s__uncultured_rumen_bacterium_g__Lachnospiraceae_UCG-006
g__Dialister	0.812057	0.000941339	p__Firmicutes	c__Negativicutes	o__Veillonellales-Selenomonadales	f__Veillonellaceae	s__uncultured_bacterium_g__Dialister
g__Sphaerochaeta	0.808511	0.000158736	p__Spirochaetota	c__Spirochaetia	o__Spirochaetales	f__Spirochaetaceae	s__uncultured_Spirochaeta_sp._g__Sphaerochaeta
g__[Eubacterium]_xylanophilum_group	0.77305	0.000179811	p__Firmicutes	c__Clostridia	o__Lachnospirales	f__Lachnospiraceae	s__uncultured_rumen_bacterium_g__[Eubacterium]_xylanophilum_group
g__Mycoplasma	0.77305	0.000203047	p__Firmicutes	c__Bacilli	o__Mycoplasmatales	f__Mycoplasmataceae	s__uncultured_rumen_bacterium_g__Mycoplasma
g__unclassified_c__Bacteroidia	0.765957	0.000116452	p__Bacteroidota	c__Bacteroidia	o__unclassified_c__Bacteroidia	f__unclassified_c__Bacteroidia	s__unclassified_c__Bacteroidia
g__Erysipelotrichaceae_UCG-007	0.762411	0.00219286	p__Firmicutes	c__Bacilli	o__Erysipelotrichales	f__Erysipelotrichaceae	s__uncultured_bacterium_g__Erysipelotrichaceae_UCG-007
g__Monoglobus	0.758865	0.000112129	p__Firmicutes	c__Clostridia	o__Monoglobales	f__Monoglobaceae	s__uncultured_rumen_bacterium_g__Monoglobus
g__Pyramidobacter	0.744681	0.000137121	p__Synergistota	c__Synergistia	o__Synergistales	f__Synergistaceae	s__uncultured_rumen_bacterium_g__Pyramidobacter
g__Ligilactobacillus	0.70922	0.000174812	p__Firmicutes	c__Bacilli	o__Lactobacillales	f__Lactobacillaceae	s__unclassified_g__Ligilactobacillus
g__Lactobacillus	0.695035	0.000109156	p__Firmicutes	c__Bacilli	o__Lactobacillales	f__Lactobacillaceae	s__Lactobacillus_acetotolerans
g__Elusimicrobium	0.695035	0.000116992	p__Elusimicrobiota	c__Elusimicrobia	o__Elusimicrobiales	f__Elusimicrobiaceae	s__unclassified_g__Elusimicrobium
g__Megasphaera	0.666667	0.000135635	p__Firmicutes	c__Negativicutes	o__Veillonellales-Selenomonadales	f__Veillonellaceae	s__Megasphaera_elsdenii_DSM_20460
g__[Eubacterium]_eligens_group	0.656028	0.000237091	p__Firmicutes	c__Clostridia	o__Lachnospirales	f__Lachnospiraceae	s__uncultured_bacterium_g__[Eubacterium]_eligens_group
g__Acidaminococcus	0.656028	0.00010686	p__Firmicutes	c__Negativicutes	o__Acidaminococcales	f__Acidaminococcaceae	s__uncultured_rumen_bacterium_g__Acidaminococcus
g__Anaerostipes	0.64539	6.97e-05	p__Firmicutes	c__Clostridia	o__Lachnospirales	f__Lachnospiraceae	s__uncultured_rumen_bacterium_g__Anaerostipes
g__Allisonella	0.606383	0.000123206	p__Firmicutes	c__Negativicutes	o__Veillonellales-Selenomonadales	f__Veillonellaceae	s__uncultured_bacterium_g__Allisonella
g__Ruminiclostridium	0.602837	9.66e-05	p__Firmicutes	c__Clostridia	o__Oscillospirales	f__Hungateiclostridiaceae	s__unclassified_g__Ruminiclostridium
