# Supplementary material
Source: Research Square preprint supplement (doi:10.21203/rs.3.rs-9101224/v1)
Supplement: Supplementary file 10 [file ea6dd7382f9ec7f0853ea4c0.xlsx]

## Sheet: Batch effect 
Before Batch Effect Correction: PERMANOVA Results Table with PLSDA_Batch
Characteristics	Df	SumsOfSqs	R2	F_Model	Pr(>F)
group	4	5.58451	0.13652	15.0378	0.001
batch	11	2.27009	0.0555	1.66713	0.001
Residual	317	33.0516	0.80798	-	-
Total	332	40.9062	1	-	-
After Batch Effect Correction: PERMANOVA Results Table with PLSDA_Batch
Characteristics	Df	SumsOfSqs	R2	F_Model	Pr(>F)
group	4	5.28777	0.17855	21.6909	0.001
batch	11	2.63156	0.08886	2.94406	0.001
Residual	317	21.6963	0.7326	-	-
Total	332	29.6156	1	-	-
R² value represents the proportion of sample variation explained by grouping or batch factors; a larger R² indicates a higher explanatory power of grouping or batch on the observed variation. Pr denotes the P-value, with values below 0.05 indicating high reliability of the test. After batch effect correction, Pr < 0.05 confirms the high validity of the test and demonstrates that different batches…
